# Supplementary material for: Modulating endothelial adhesion and migration impacts stem cell therapies efficacy
Source: PubMed Central journal article supplement — eBioMedicine. 2020 Sep 14;60:102987. doi: 10.1016/j.ebiom.2020.102987 (PMC7498853; doi:10.1016/j.ebiom.2020.102987), 2020-09-14

Supplemental Information for

## **Modulating Endothelial Adhesion and Migration impacts Stem Cell Therapies Efficacy**

Richard Schäfer<sup>1,2\*</sup>, Matthias Schwab<sup>3,4,24,17,18</sup>, Georg Siegel<sup>2</sup>, Andreas von Ameln-Mayerhofer<sup>5</sup>, Marine Buadze<sup>3</sup>, Ali Lourhmati<sup>3</sup>, Hans-Peter Wendel<sup>6</sup>, Torsten Kluba<sup>7</sup>, Marcel A. Krueger<sup>8</sup>, Carsten Calaminus<sup>8</sup>, Eva Scheer<sup>2</sup>, Massimo Dominici<sup>9</sup>, Giulia Grisendi<sup>9</sup>, Thorsten R. Doepfner<sup>10,11</sup>, Jana Schlechter<sup>10</sup>, Anne Kathrin Finzel<sup>3</sup>, Dominic Gross<sup>3</sup>, Roland Klaffschinkel<sup>2</sup>, Frank K. Gehring<sup>2,12</sup>, Gabriele Spohn<sup>1</sup>, Anja Kretschmer<sup>1</sup>, Karen Bieback<sup>13</sup>, Eva-Maria Krämer-Albers<sup>14</sup>, Kerstin Barth<sup>14</sup>, Anne Eckert<sup>15</sup>, Stefanie Elser<sup>16</sup>, Joerg Schmehl<sup>16</sup>, Claus D. Claussen<sup>16</sup>, Erhard Seifried<sup>1</sup>, Dirk M. Hermann<sup>10</sup>, Hinnak Northoff<sup>2</sup> & Lusine Danielyan<sup>3,17\*</sup>

<sup>1</sup>Institute for Transfusion Medicine and Immunohematology, German Red Cross Blood Donor Service Baden-Württemberg-Hessen gGmbH, Goethe-University Hospital, Frankfurt am Main, Germany

<sup>2</sup>Institute of Clinical and Experimental Transfusion Medicine, University Hospital Tübingen, Tübingen, Germany

<sup>3</sup>Department of Clinical Pharmacology, University Hospital Tübingen, Tübingen, Germany

<sup>4</sup>Dr. Margarete Fischer-Bosch Institute of Clinical Pharmacology, Stuttgart, Germany

<sup>5</sup>Department of Pharmacy, Sindelfingen-Böblingen Medical Center, University of Tübingen, Sindelfingen, Germany

Departments of <sup>6</sup>Thoracic, Cardiac and Vascular Surgery and of <sup>7</sup>Orthopaedic Surgery, University Hospital Tübingen, Tübingen, Germany

<sup>8</sup>Werner Siemens Imaging Center, Department of Preclinical Imaging and Radiopharmacy, University Hospital Tübingen, Tübingen, Germany

<sup>9</sup>Department of Medical and Surgical Sciences for Children & Adults, University Hospital of Modena and Reggio Emilia, Modena, Italy

<sup>10</sup>Department of Neurology, University of Duisburg-Essen, Essen, Germany

<sup>11</sup>Department of Neurology, University Medical Center Göttingen, Göttingen, Germany

<sup>12</sup>3T GmbH & Co. KG, Tuttlingen, Germany

<sup>13</sup>Institute of Transfusion Medicine and Immunology, German Red Cross Blood Service Baden-Württemberg – Hessen gGmbH,

Medical Faculty Mannheim, Heidelberg University, Germany

<sup>14</sup>Institute for Developmental Biology and Neurobiology,  
Johannes Gutenberg University Mainz, Mainz, Germany

<sup>15</sup>Neurobiology Laboratory for Brain Aging and Mental Health,  
Molecular and Cognitive Neuroscience, University of Basel, Basel, Switzerland

<sup>16</sup>Department of Radiology, University Hospital Tübingen, Tübingen, Germany

<sup>17</sup>Department of Pharmacy and Biochemistry, University of Tübingen,  
Tübingen, Germany

<sup>18</sup>Neuroscience Laboratory and Departments of Biochemistry and Clinical  
Pharmacology, Yerevan State Medical University, Yerevan, Armenia

This file includes:

- Supplementary Figures 1-10
- Supplementary Tables 1+2
- Full Blots

Supplementary Figure 1

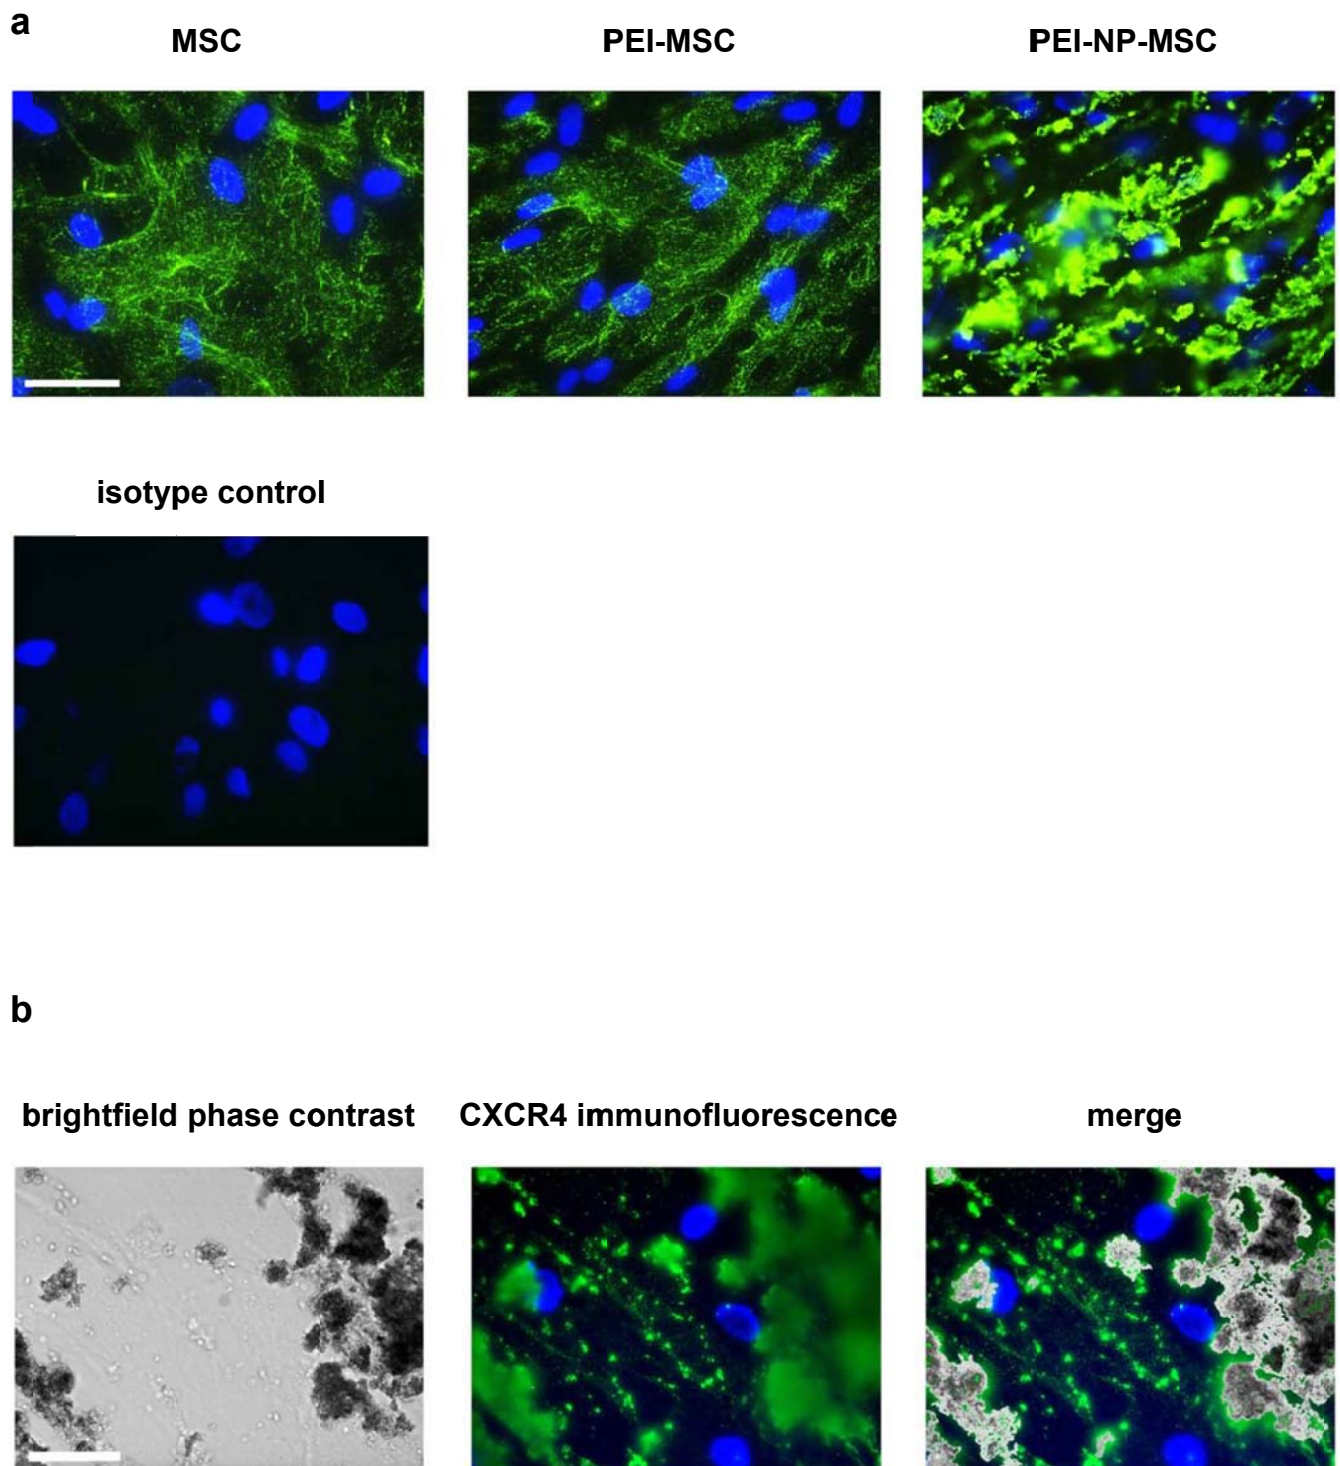

**c**

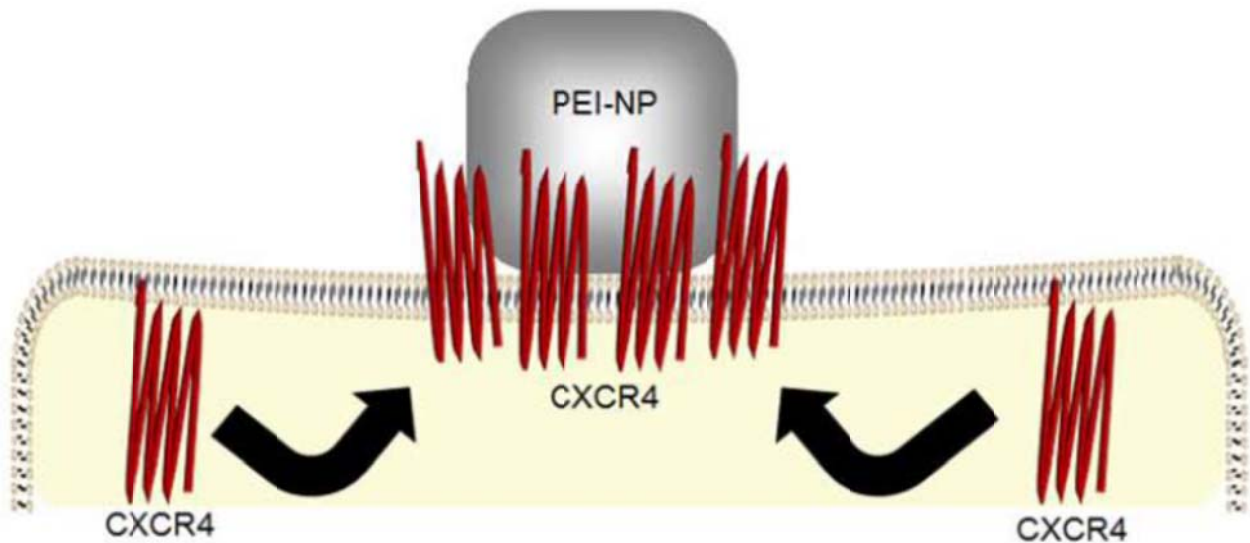

**Supplementary Figure 1 CXCR4 expression pattern on human BM-MSC.**

**a**, The overall expression of CXCR4 was not affected by treatment of MSC with PEI alone and an even distribution of CXCR4 molecules could be observed on the surface of untreated MSCs and MSCs treated with PEI alone. In contrast, the CXCR4 signal was strongly increased on MSCs treated with PEI in combination with NP. In particular, the CXCR4 molecules showed an aggregated distribution pattern on the cellular surface of PEI-NP-MSCs. The absence of green fluorescence in isotype control confirmed specificity of anti-CXCR4 antibodies and excluded unspecific auto-fluorescence of NP. Green: CXCR4; blue: DAPI; scale bar: 50  $\mu$ m. **b**, PEI-NP-MSC: The increased CXCR4 expression was closely related to the localization of the PEI-NP complexes on the surface of MSC. The PEI-NP complexes in the merged microphotograph were highlighted in grey using Adobe Photoshop CS5.1; scale bar: 50  $\mu$ m. **c**, Suggested mechanism of increased CXCR4 expression on PEI-NP-MSC: PEI-NP complexes trigger the inside-out flipping of CXCR4 molecules to the surface of MSC.

## Supplementary Figure 2

**a**

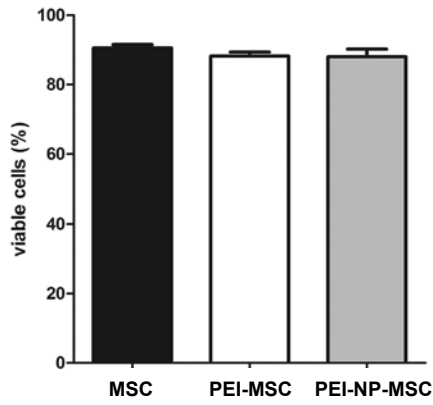

**b**

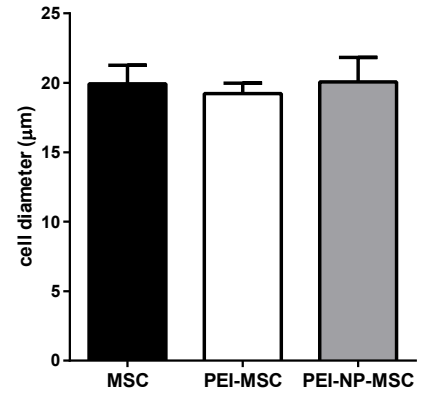

**c**

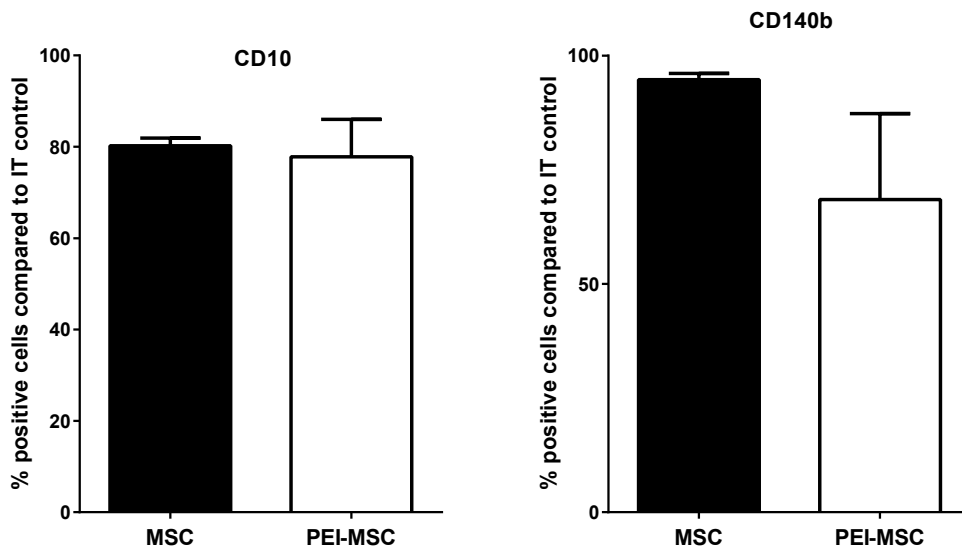

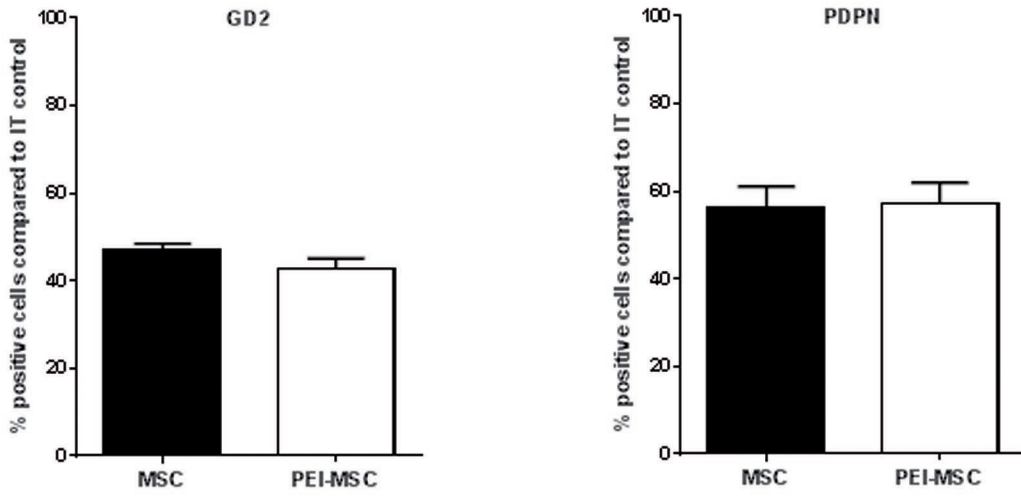

**d**

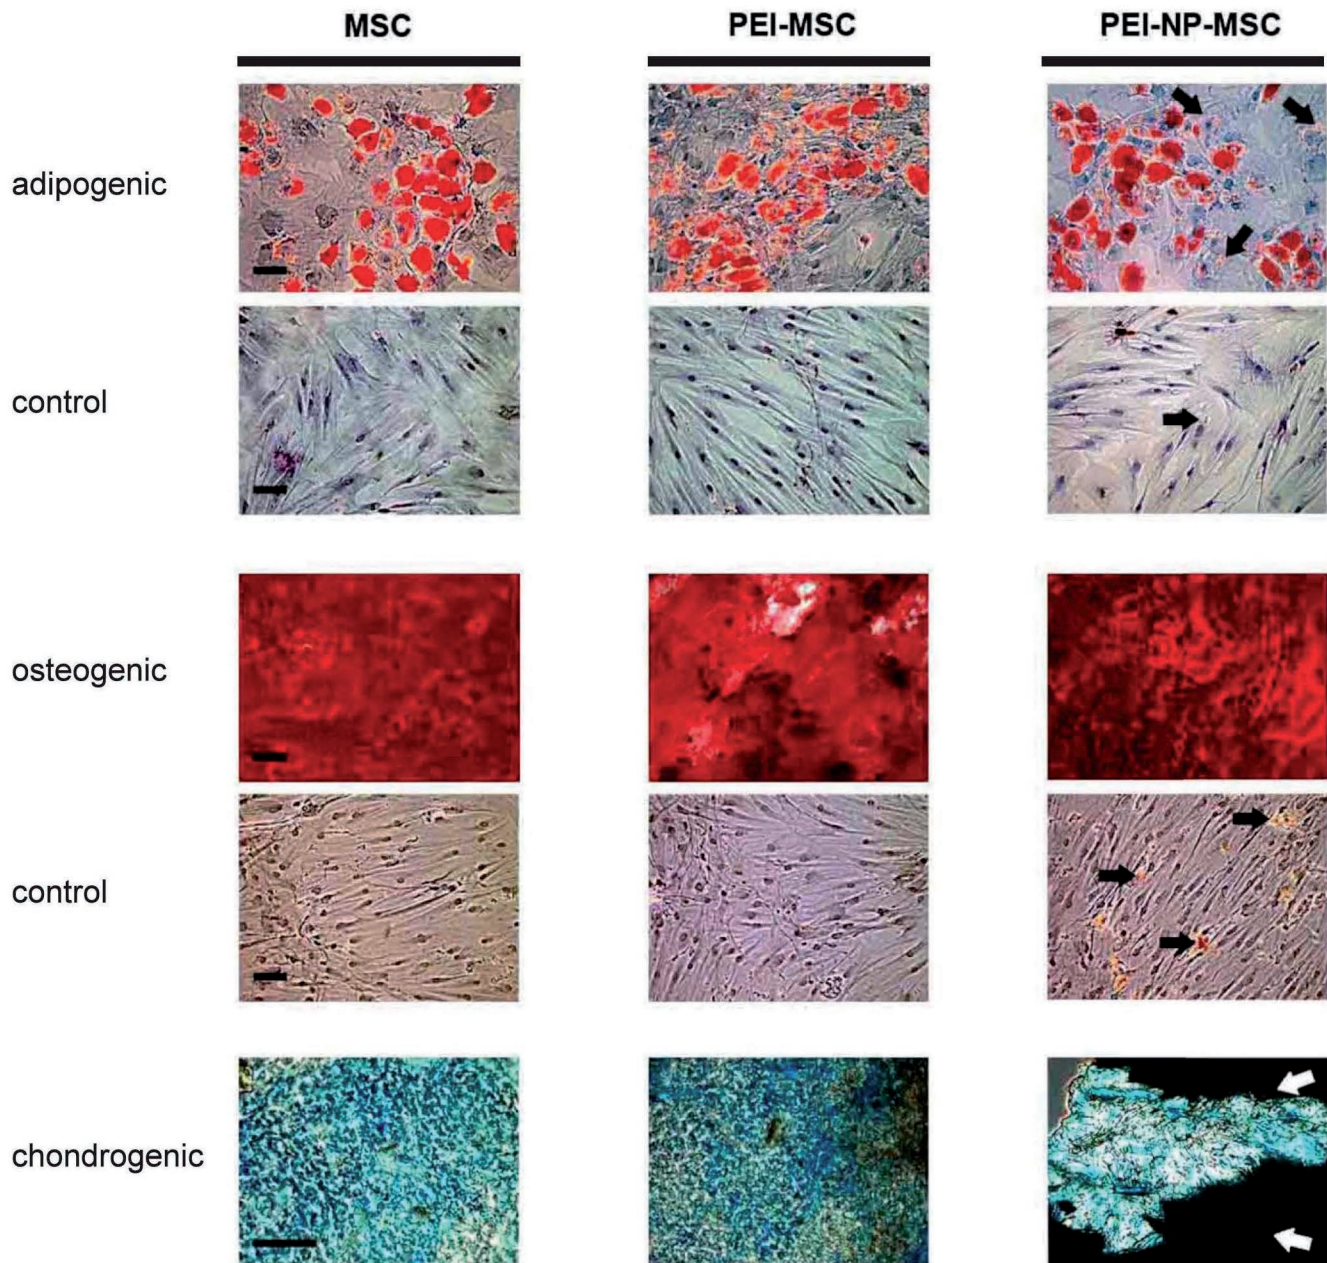

e

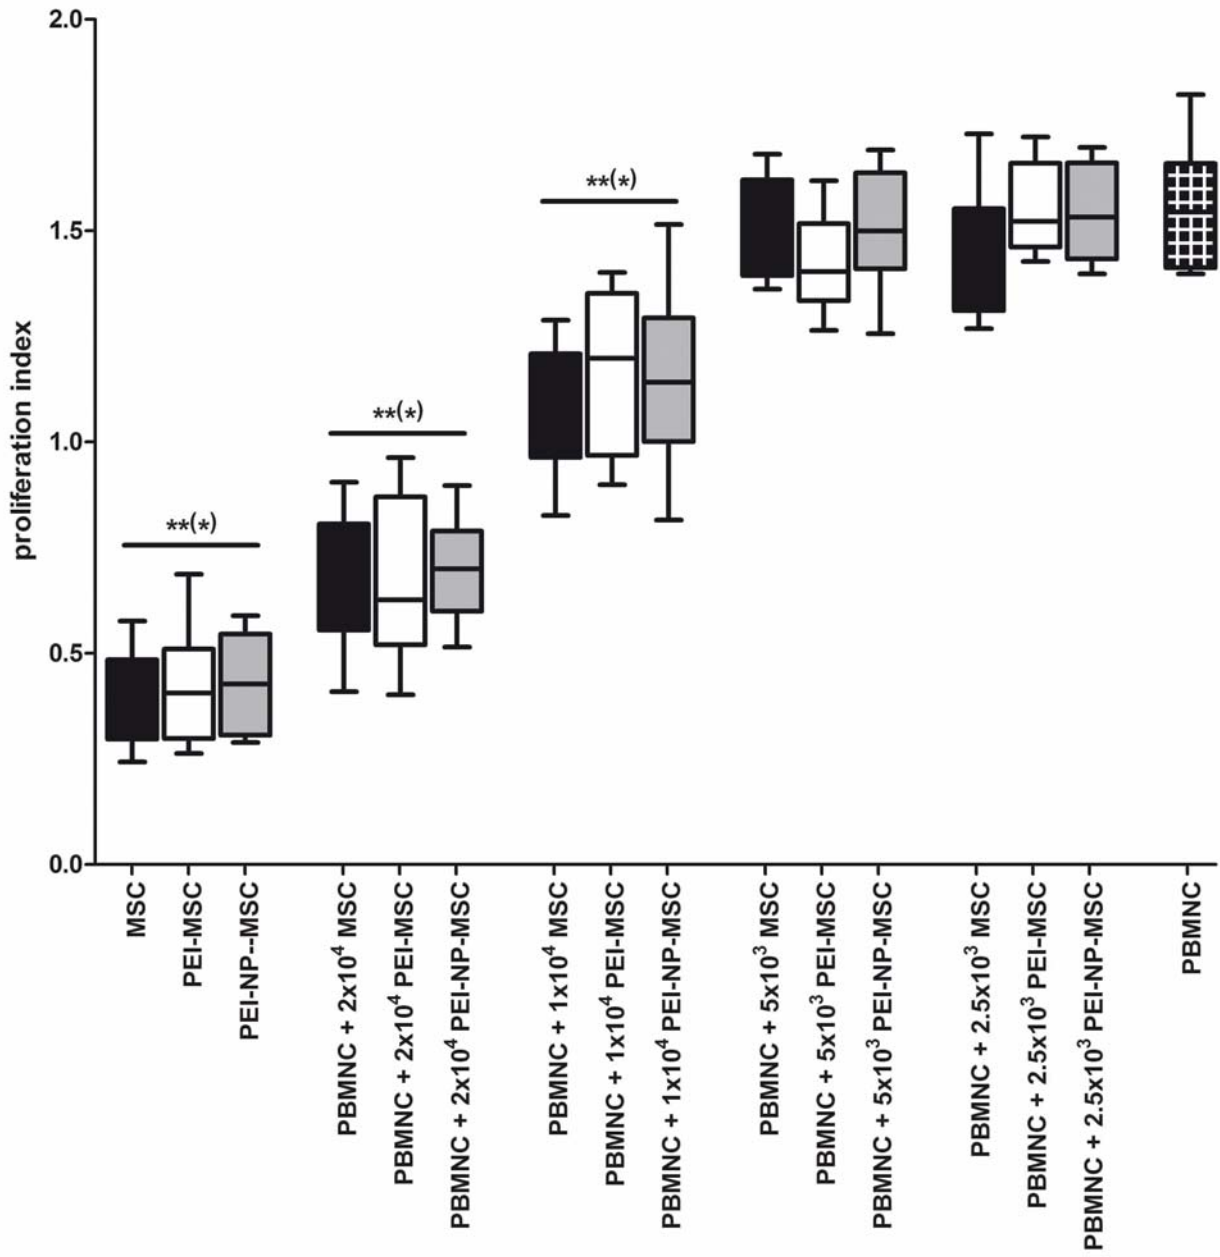

f

supernatant

cell lysate

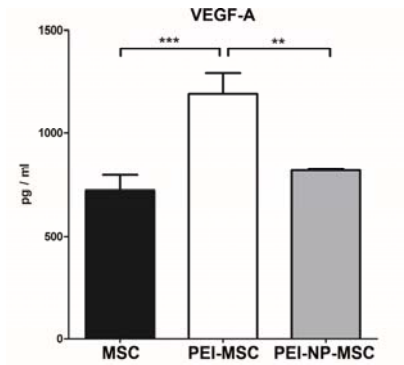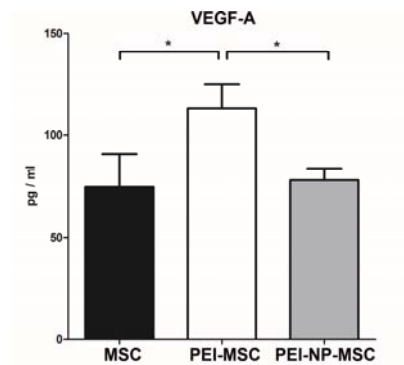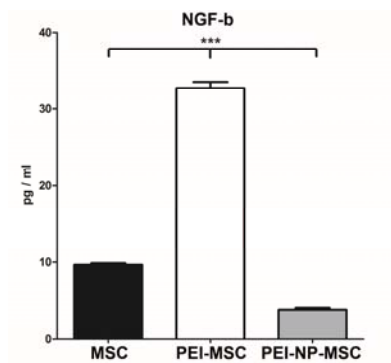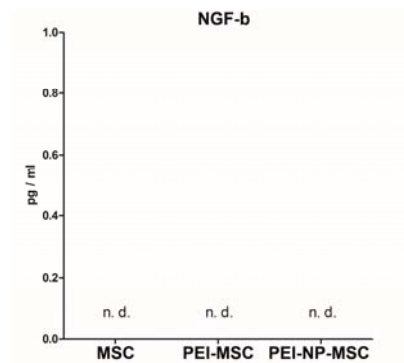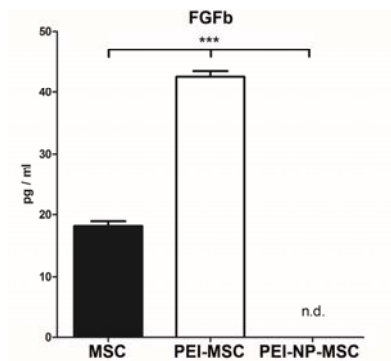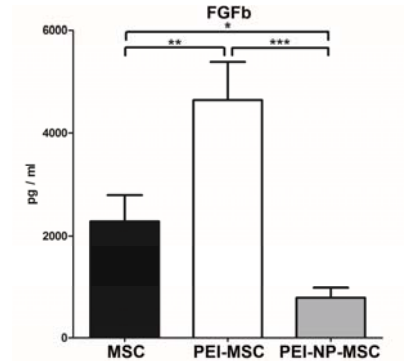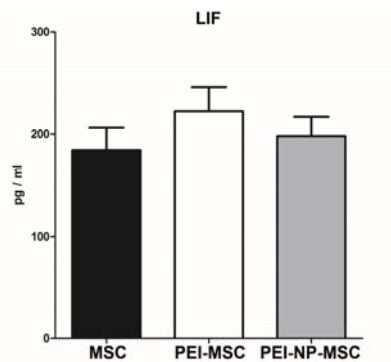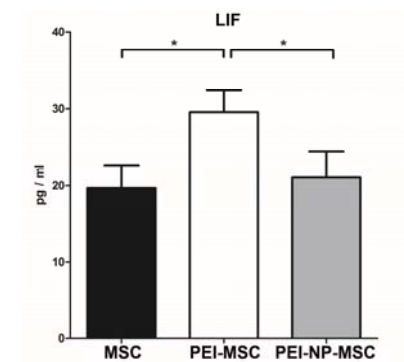



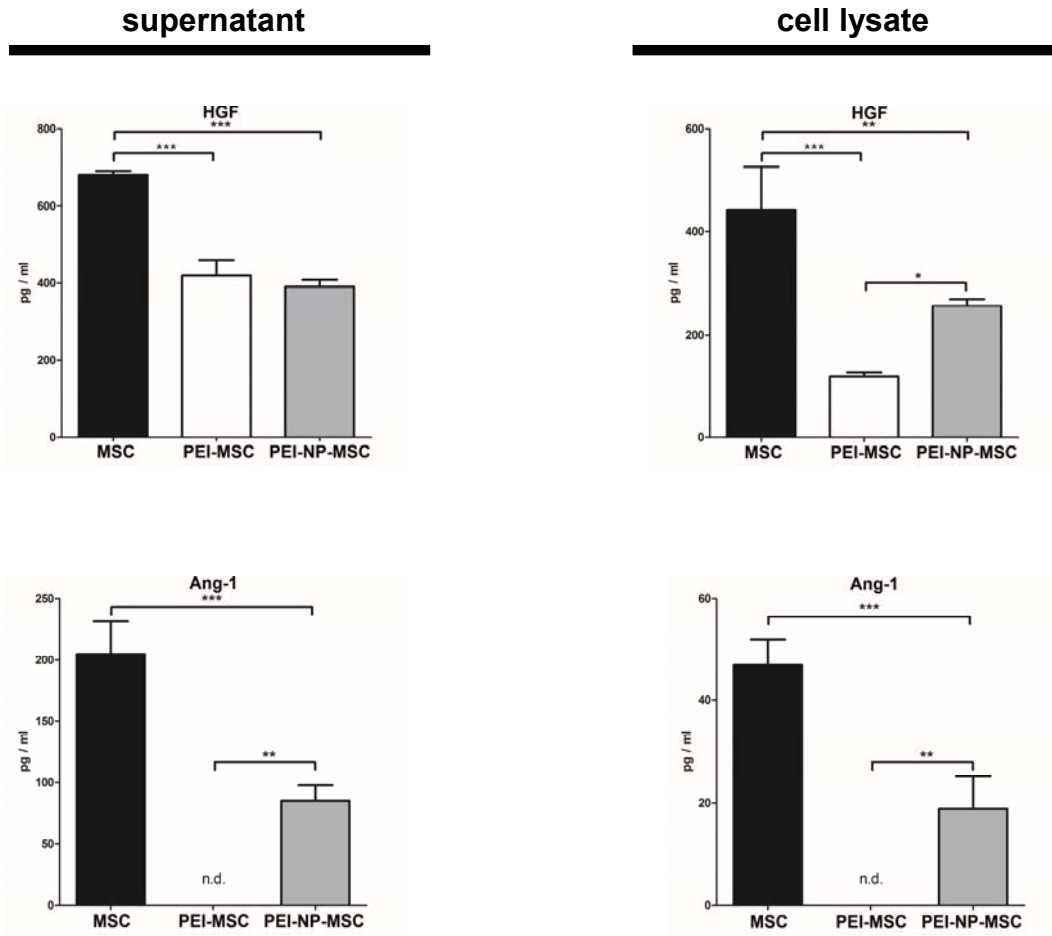

9

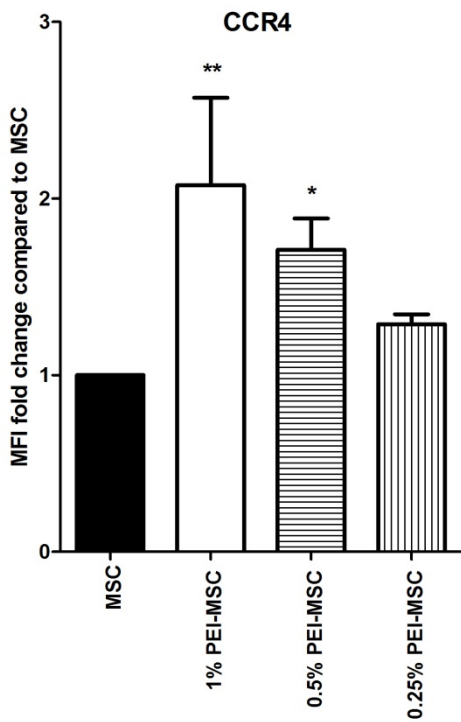

**Supplementary Figure 2 Characterization of treated and untreated human BM-MSC.**

**a**, MSC viability. The viability of MSC was not affected by treatment with PEI alone or in combination with NP. N=5; ANOVA analysis of variance. Error bars: SD. **b**, MSC diameter. The mean diameter of MSC, PEI-MSC and PEI-NP-MSC was not significantly different. N=6; ANOVA analysis of variance. Error bars: SD. **c**, Flow cytometry analyses of MSC phenotype. Treatment with PEI did not affect the percentages of MSC expressing CD10, CD140b (PDGFRb), GD2, or PDPN within the MSC preparation. N=2; two-tailed t-test. Error bars: SD. **d**, *In vitro* differentiation potential of MSC. After treatment with the respective differentiation media, the MSCs differentiated into cells of the adipogenic, osteogenic and chondrogenic lineage *in vitro*. Lipid vacuoles of adipogenic differentiated MSC are stained in red with Red-Oil-O (first row), undifferentiated MSC (second row). Calcium deposits of osteogenic differentiated MSC are stained in red with Alizarin Red (third row), undifferentiated MSC (fourth row). Mucopolysaccharides of chondrogenic differentiated MSC pellets are stained in bluish-green (fifth row). The treatment with PEI alone or in combination with NP did not affect the *in vitro* differentiation potential of the MSC (N=4). Arrows: PEI-NP complexes. Scale bars: 100  $\mu$ m. **e**, Immunomodulatory capacities of MSC. The proliferation of  $1 \cdot 10^5$  PBMNC activated by PHA could be significantly suppressed by the addition of  $0.1 \cdot 10^5$  MSC or  $0.2 \cdot 10^5$  MSC, whereas the addition of  $0.05 \cdot 10^5$  MSC or  $0.025 \cdot 10^5$  MSC did not show an effect on the proliferation of PBMNC. No differences between the immunomodulatory capacities of untreated MSC, PEI-MSC, or PEI-NP-MSC could be observed within the same MSC-PBMNC ratios. ANOVA analysis of variance; stars indicate statistical comparisons of the respective MSC-PBMNC groups to PBMNCs alone; N=4 (\*\*p <0.01; \*\*\*p <0.001). Error bars: SD. **f**, Profile of MSC trophic factors. Treatment of MSC with PEI alone resulted in increased secretion and/or production of vascular endothelial growth factor (VEGF)-A, nerve growth factor (NGF)-b, fibroblast growth factor basic (FGFb), and leukemia inhibitory factor (LIF). Notably, accumulated NGF-b could be detected only in the supernatants of untreated and

*Supplementary Information - Schäfer et al.*

treated MSC but not in the respective cell lysates. Treatment of MSC with PEI with or without NP decreased the secretion and production of hepatocyte growth factor (HGF) and Angiopoietin-1. n.d.: not detectable. N=3; ANOVA analysis of variance (\*p<0.05; \*\*p <0.01; \*\*\*p <0.001). Error bars: SD. **g**, PEI dose effect on CCR4 expression of MSC. Increase of CCR4 expression was clearly dose depending with maximal fold change of CCR4 expression compared to untreated MSC of MSCs treated with 1% PEI (standard dose in this work), followed by 0.5% PEI and 0.25% PEI; ANOVA analysis of variance (\*p <0.05; \*\*p <0.01). Error bars: SD.

### Supplementary Figure 3

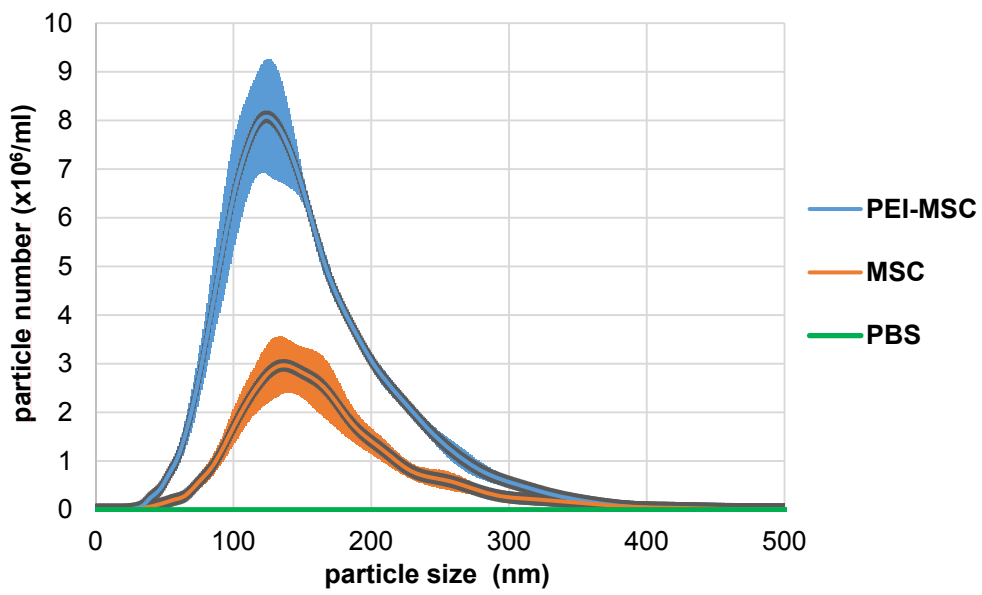

|                                     | <b>MSC</b>  | <b>PEI-MSC</b> |
|-------------------------------------|-------------|----------------|
| Mean size (nm)                      | 172 +/-2.5  | 151 +/-3.5     |
| Total number ( $10^8$ particles/ml) | 2.84 +/-0.7 | 8.48 +/-1.1    |

**Supplementary Figure 3 Nanoparticle tracking analysis of Extracellular Vesicles (EVs)**

Nanoparticle tracking analysis of Extracellular Vesicles (EVs) derived from untreated and PEI-treated human BM-MSC (N=3, different donors). PEI-treated MSC released significantly more EVs. EVs were isolated by differential centrifugation. Final 100.000 x g pellets were re-suspended in PBS and size-distribution of EVs was determined by laser based particle tracking.

Error bars: SEM. Mean particle size and the total number of particles (area under the curve) collected from each sample type are denoted in the table below the graph.

### Supplementary Figure 4

a

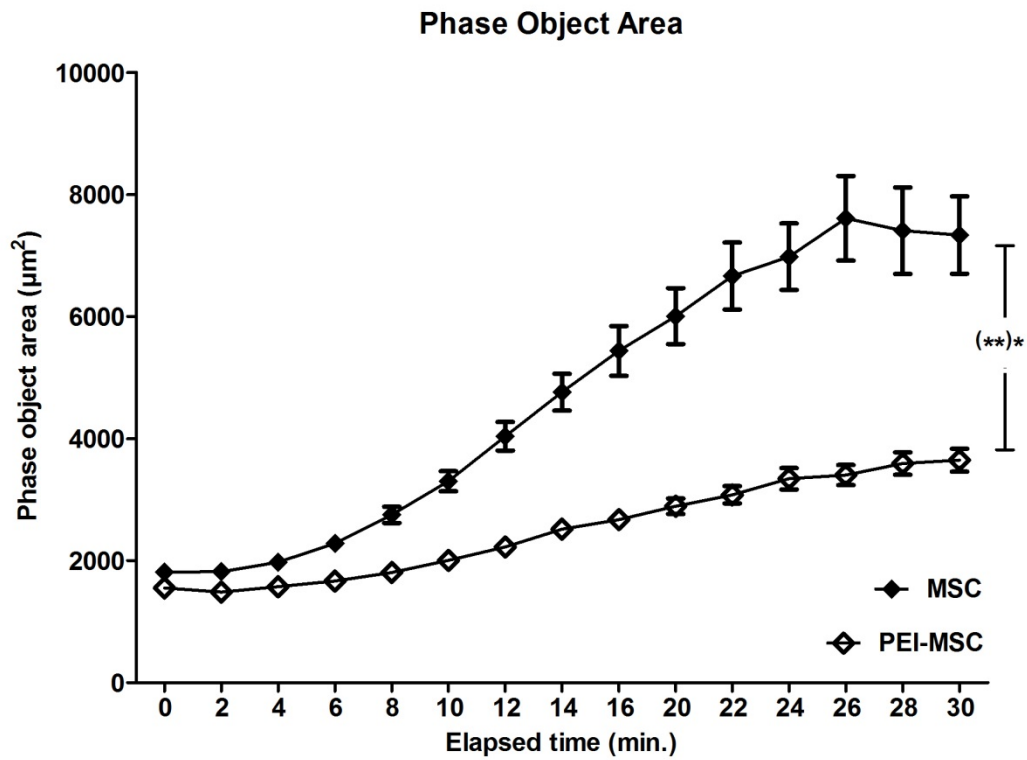

b

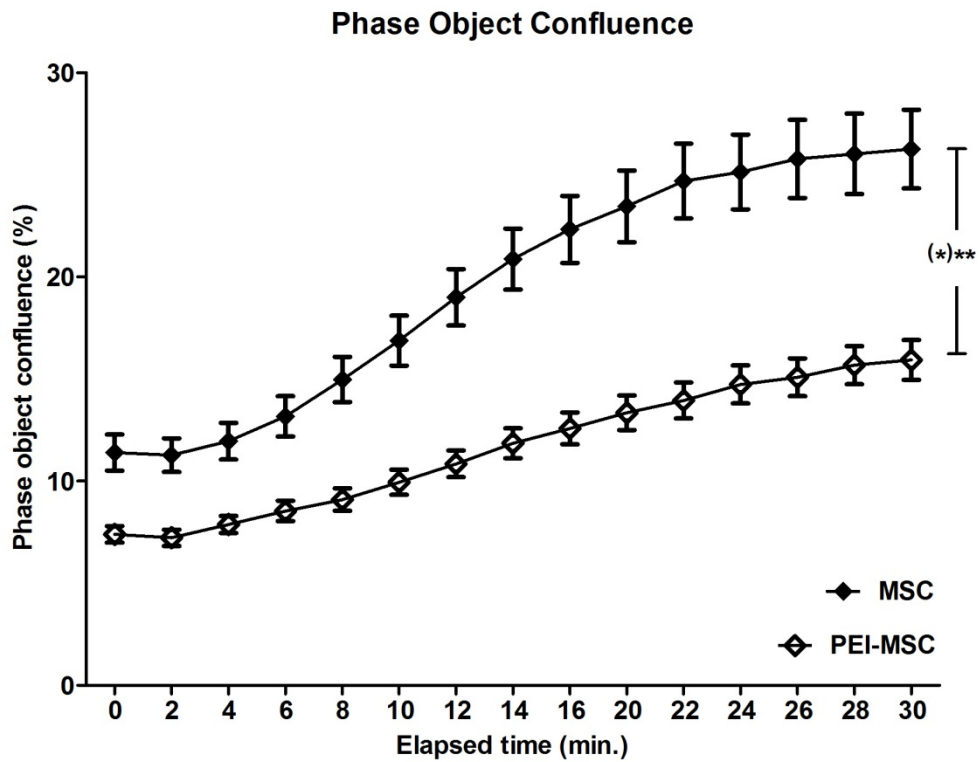

#### Supplementary Figure 4

##### Effects of PEI treatment on adhesion capacity dynamics of human BM-MSC *in vitro*.

Adhesion capacity dynamics of human BM-MSC were assessed by live cell imaging of covered area and confluence in 2 minute-intervals for up to 30 minutes.

**a, b**, Covered area and confluence. Over the recorded time PEI-MSC covered a smaller area hereby reaching a lower degree of confluence. PEI treatment resulted in delayed adhesion capacity of MSC compared to untreated MSC; two-tailed t-test (\* $p < 0.05$ ; \*\* $p < 0.01$ ; \*\*\* $p < 0.001$ ). Error bars: SEM.

Supplementary Figure 5

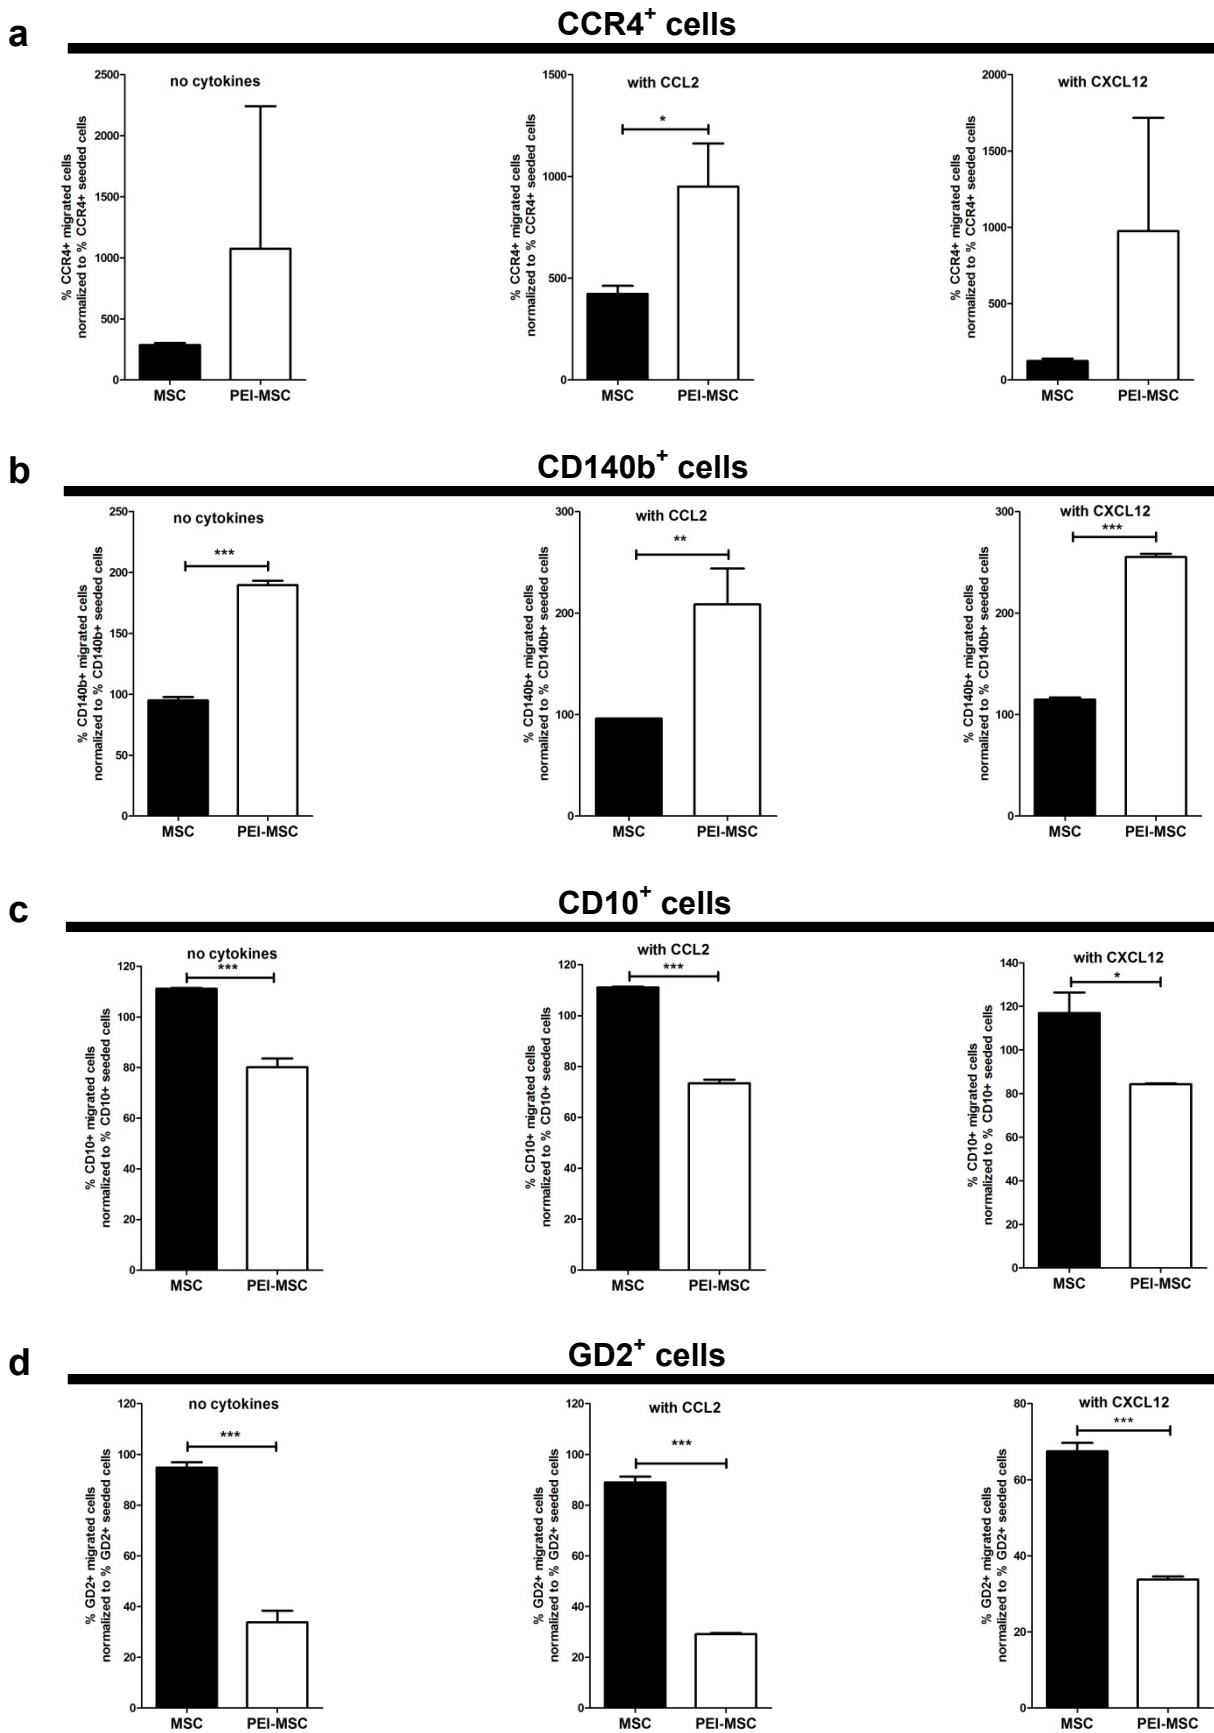



## Supplementary Figure 5

### Effects of PEI treatment on migration of human BM-MSC subpopulations *in vitro*.

Migrated MSC subpopulations were identified by expression of CCR4, CD140b, CD10, or GD2 by flow cytometry under three conditions *in vitro*. Effects of PEI treatment on BM-MSC subpopulations was assessed by analyses of percent migrated antigen positive cells normalized to percent antigen positive cells that were initially seeded.

**a, b**, PEI treatment promoted *in vitro* migration of CCR4+ and CD140b+ human BM-MSC subpopulations; N=2-3 technical replicates out of one experiment per subpopulation marker; two-tailed t-test (\*p < 0.05; \*\*p < 0.01; \*\*\*p < 0.001). Error bars: SD.

**c, d**, PEI treatment did not promote but appeared to inhibit *in vitro* migration of CD10+ and GD2+ human BM-MSC subpopulations; N=2-3 technical replicates out of one experiment per subpopulation marker; two-tailed t-test (\*p < 0.05; \*\*\*p < 0.001). Error bars: SD.

## Supplementary Figure 6

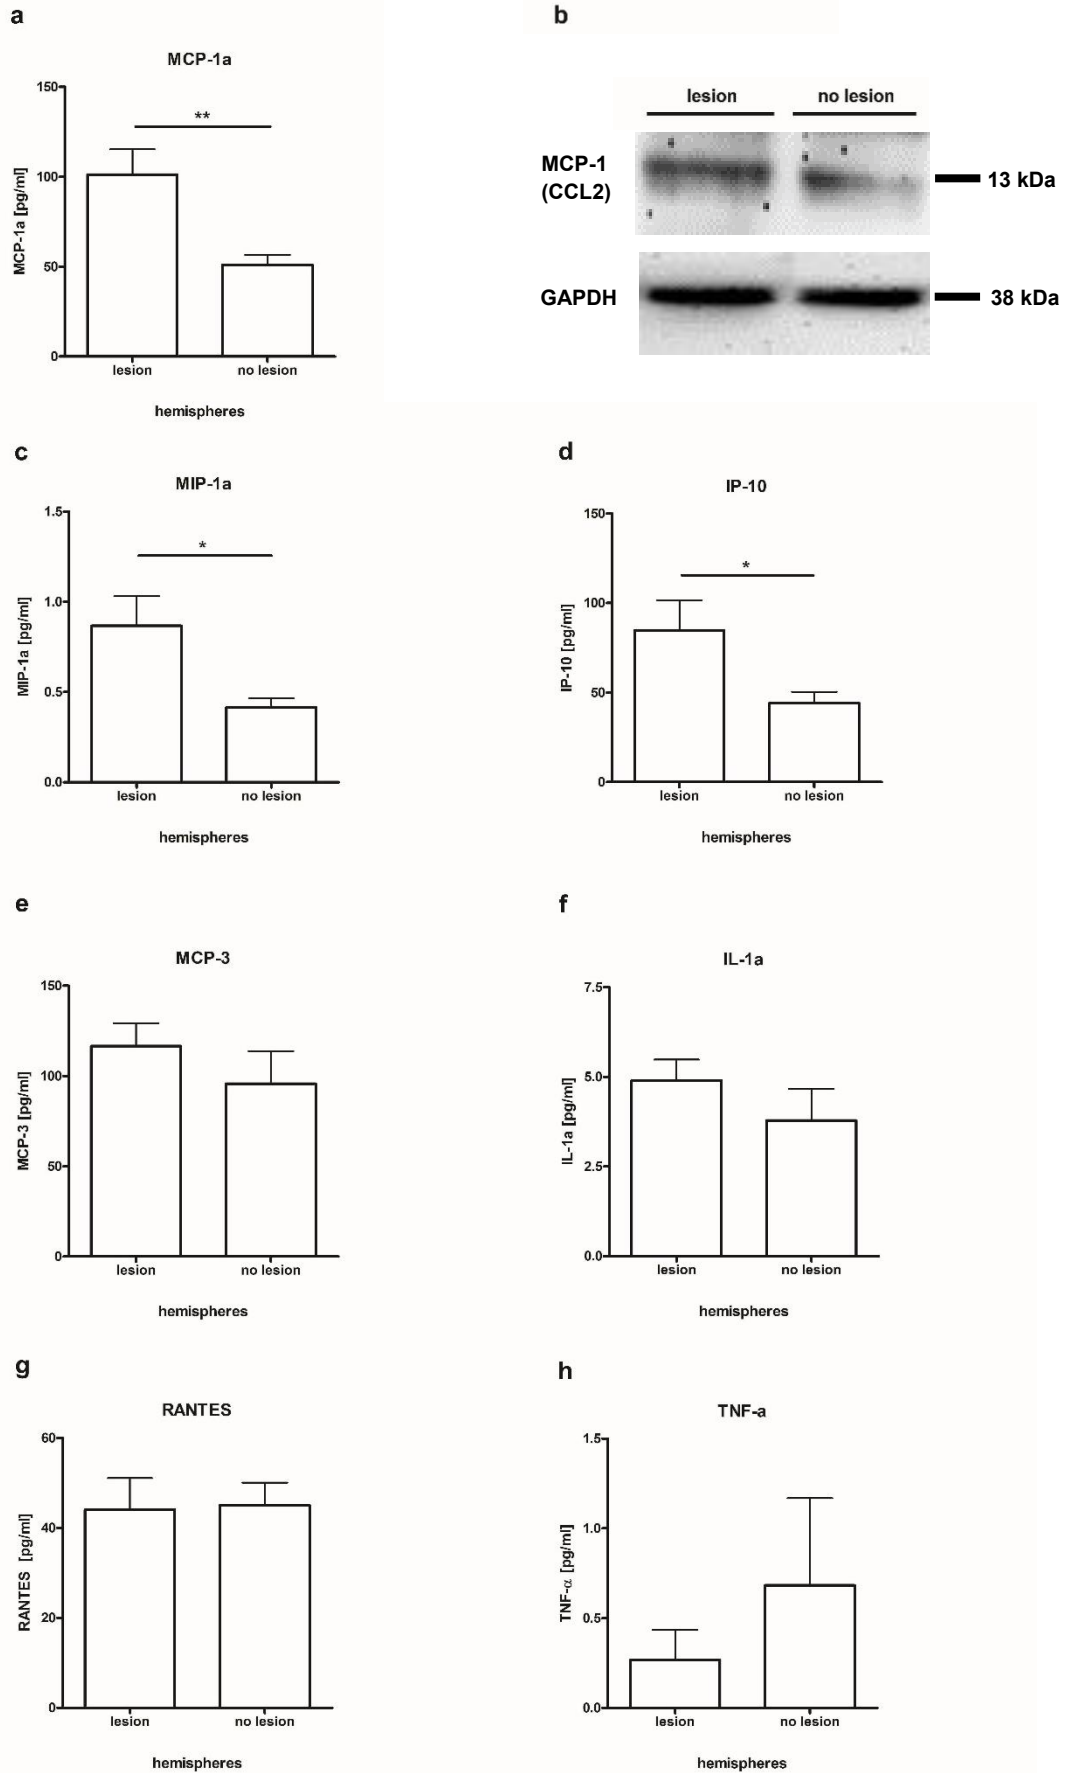

## Supplementary Figure 6

### ***In vivo* cytokine expressions in the brain after quinolinic acid lesion.**

After unilateral application of quinolinic acid (QA) into the hippocampal region brain lesioned and non-lesioned hemispheres were analyzed separately by multiplex protein quantification assays (a, c-h) or Western blot (b). **a,b**, the lesioned hemispheres contained higher concentrations of the CCR4 ligand MCP-1a (CCL2) as confirmed by two technologies. **c,d**, more MIP-1a and IP-10 protein could be detected in the lesioned hemispheres compared to the non-lesioned hemispheres. **e-h**, no differences in the concentrations of MCP-3, IL-1a, RANTES, and TNF- $\alpha$  were observed.

Two-tailed t-test (\*p <0.05; \*\*p <0.01). N=5; Error bars: SD.

## Supplementary Figure 7

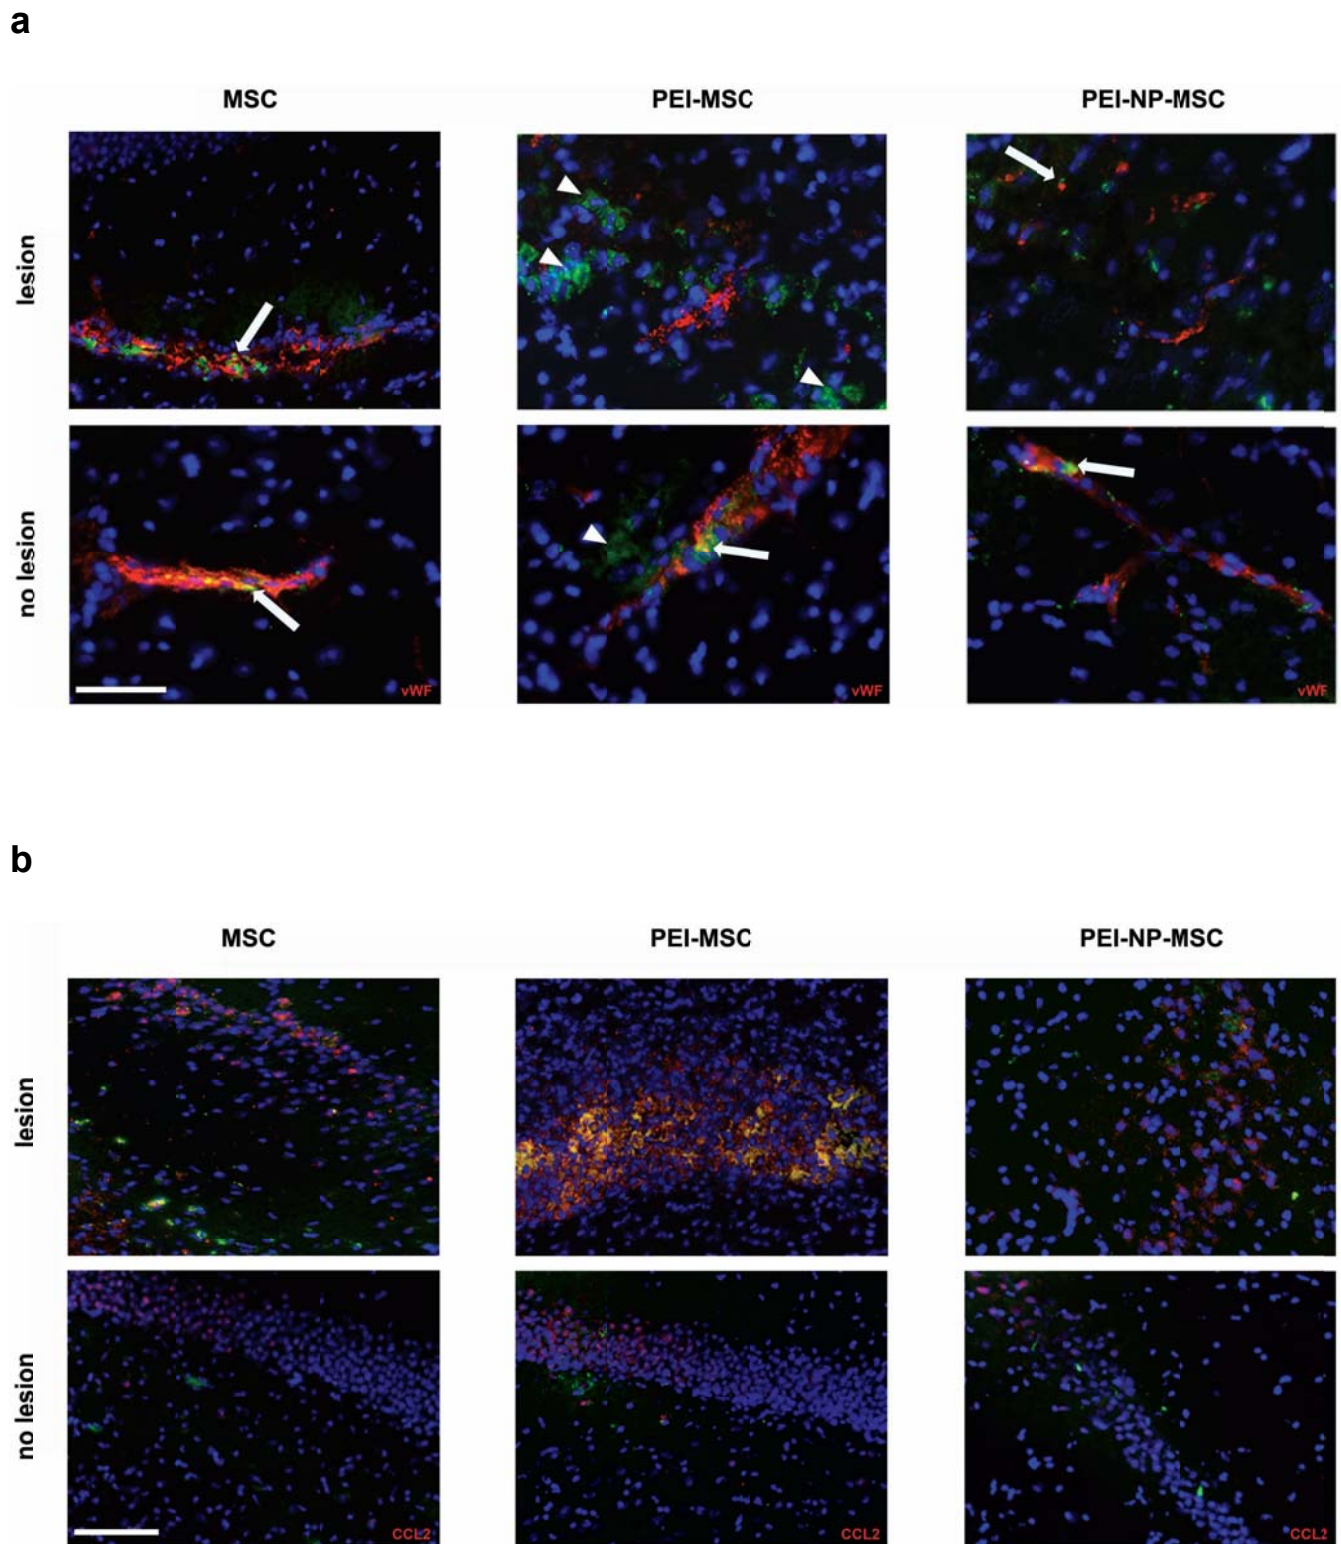

**Supplementary Figure 7 Distribution of untreated and treated green fluorescent protein (GFP) positive human BM-MSC in the QA lesioned and non-lesioned hippocampal region.**

Treated and untreated eGFP+MSC could be detected in the brain with relationship to the vasculature, marked by vWF+ endothelial cells.

**a**, In the lesioned hippocampus, we observed more MSC that transmigrated from the vessels into the brain parenchyme (arrowheads) than MSC remaining in intravascular position (arrows). *von Willebrand Factor* (vWF): red; eGFP: green; DAPI: blue; scale bar: 50  $\mu$ m.

**b**, Corresponding to the multiplex analysis more CCL2 protein was detected in the lesioned hippocampus/hemisphere and in particular, PEI-MSC accumulated in areas of high CCL2 protein expression. CCL2: red; eGFP: green; DAPI: blue; scale bar: 100  $\mu$ m.

## Supplementary Figure 8

**a**

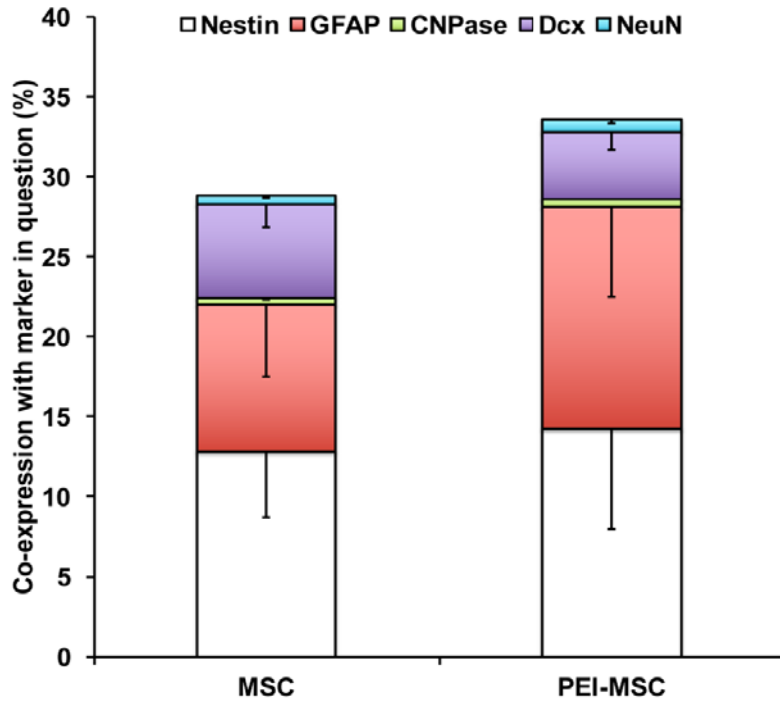

**b**

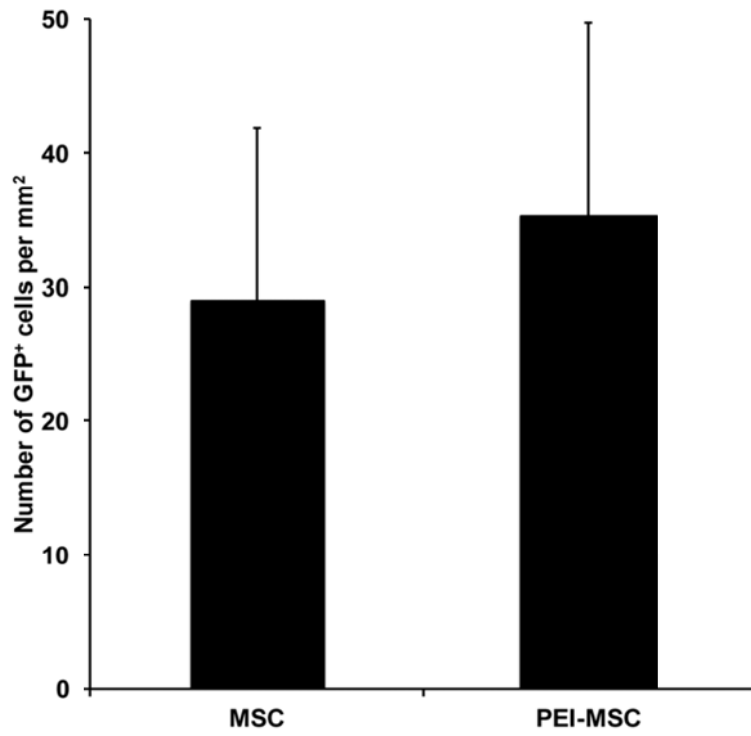

**Supplementary Figure 8 Quantitative analysis of transplanted eGFP positive human BM-MSC and their *in vivo* phenotype assessment in the post-ischemic brain.** Mice were exposed to transient focal cerebral ischemia followed by intravenous delivery of untreated MSC or PEI-MSC expressing eGFP for cell tracking as described in materials and methods. Thereafter, mice were sacrificed on day 28 post-stroke and sections for subsequent immunohistochemical GFP staining and immunohistochemical co-stainings against nestin, glial fibrillary acidic protein (GFAP), 2',3'-Cyclic-nucleotide 3'-phosphodiesterase (CNPase), doublecortin (DCX) or NeuN were performed. **a, b**, Except for DCX and CNPase, the PEI-MSC group showed a general trend to higher cell numbers but no significant differences between the two groups were observed. Error bars: SD.

Supplementary Figure 9

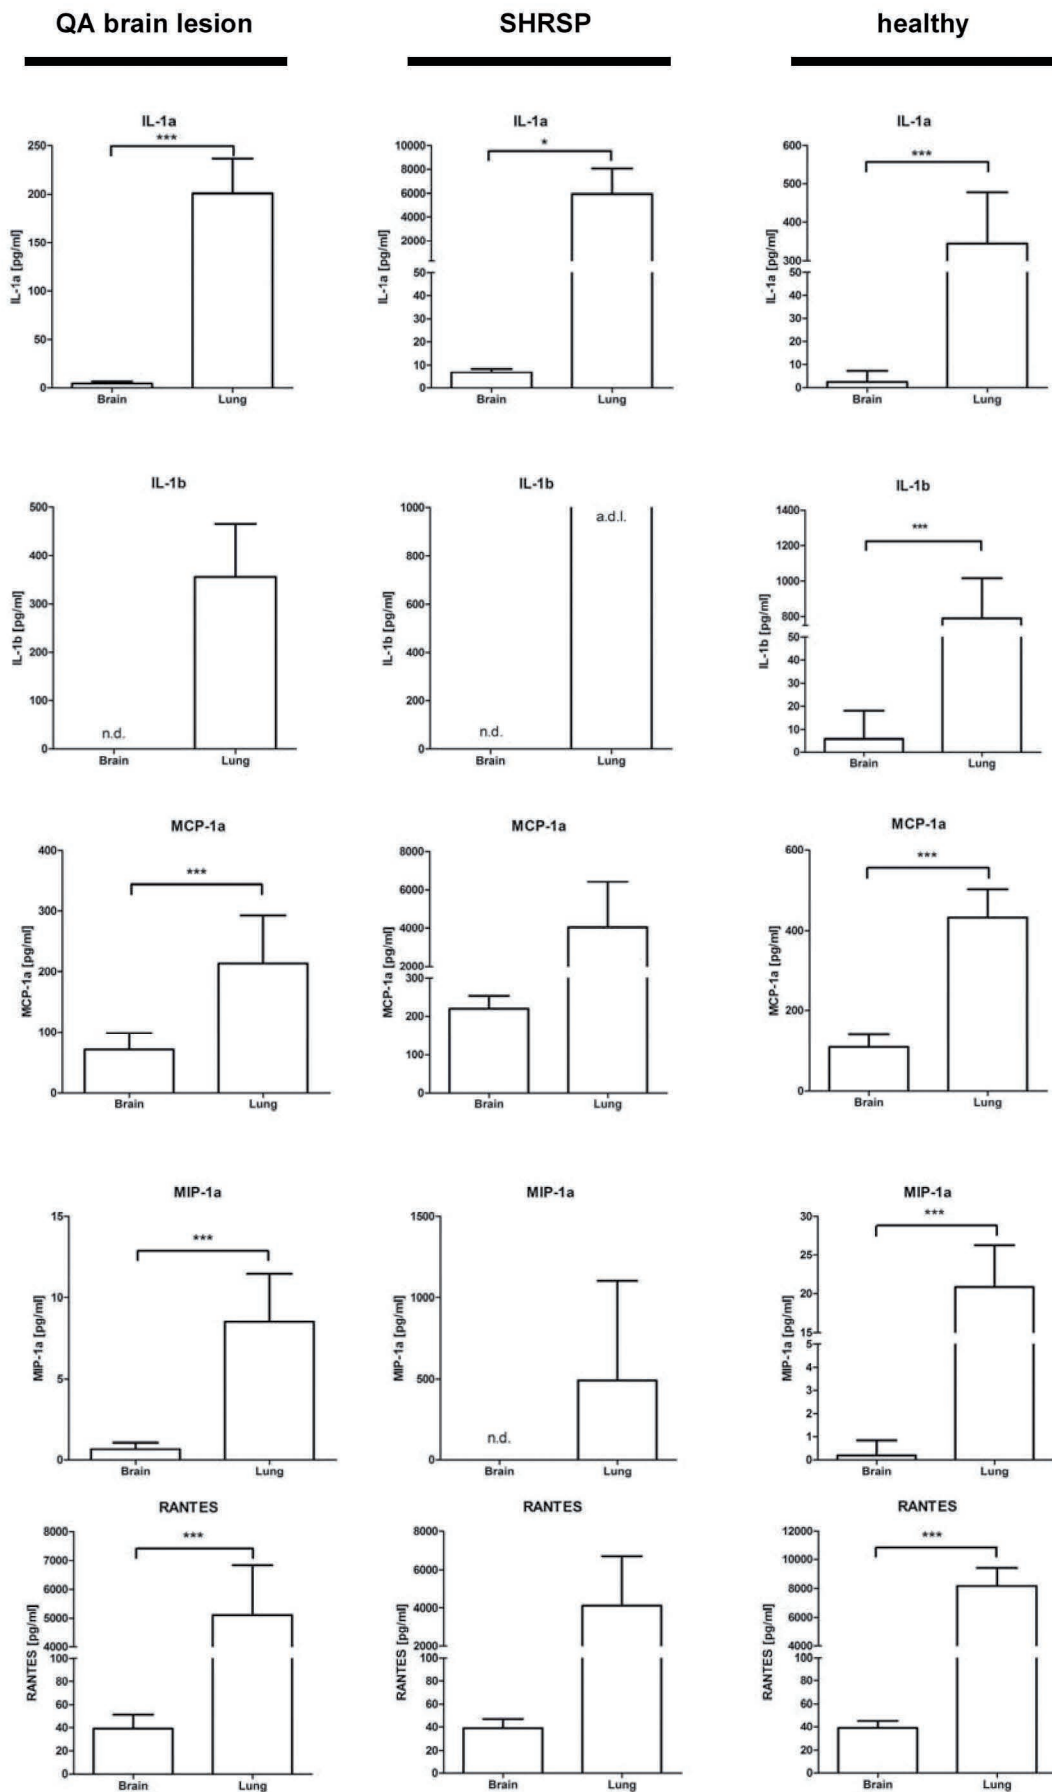



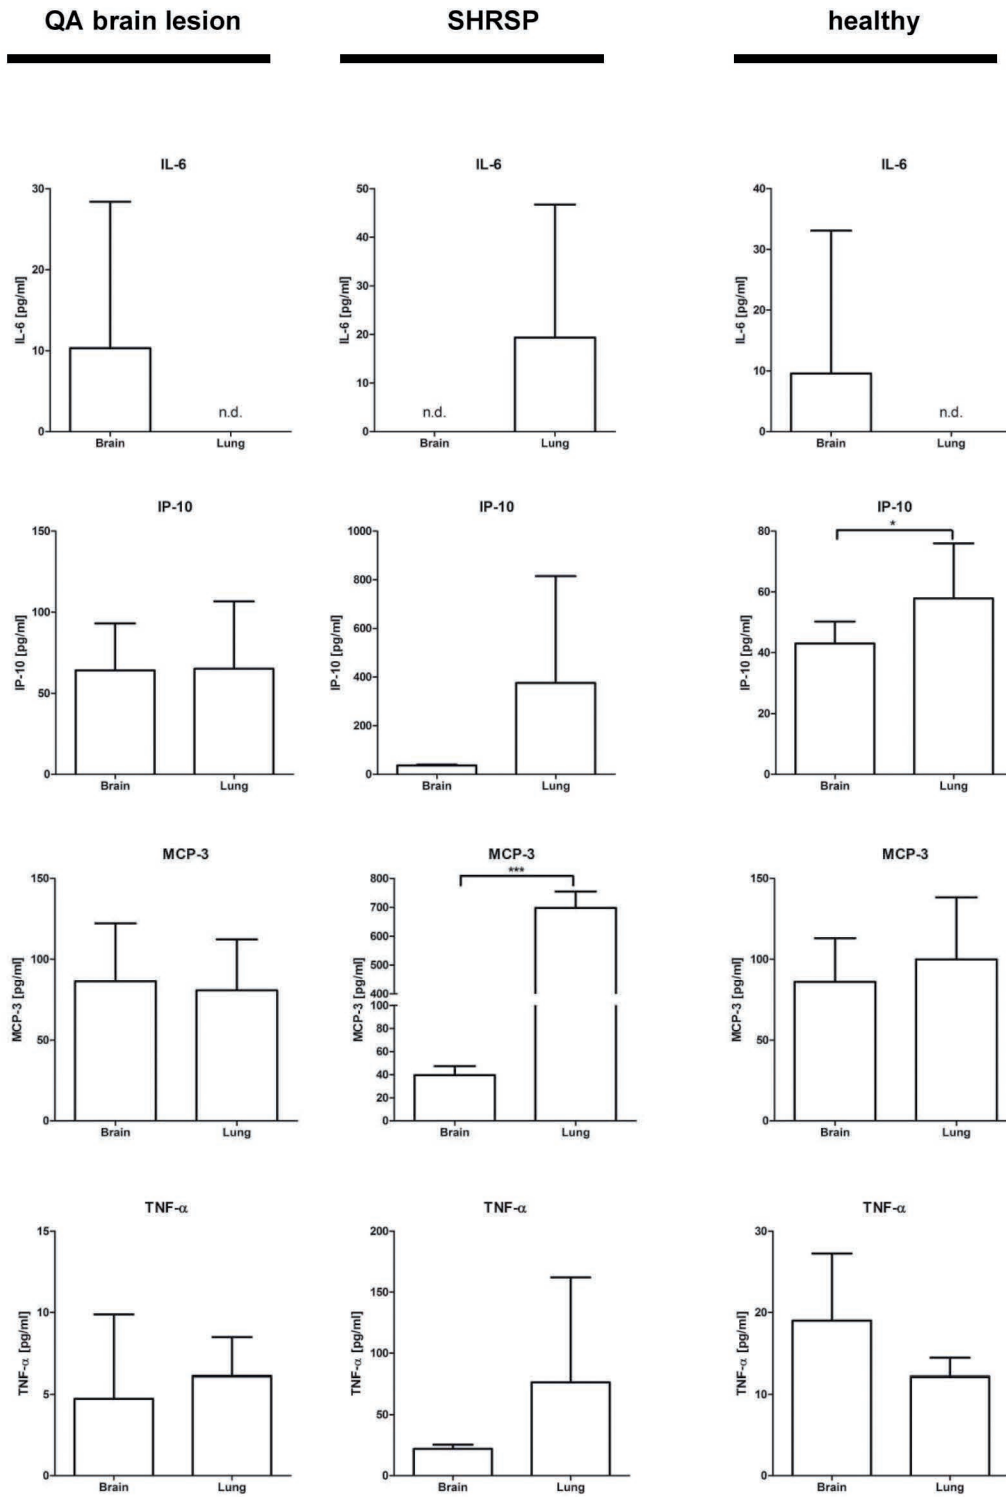

## Supplementary Figure 9

### Expressions of pro-migratory cytokines in lung and brain *in vivo*.

Multiplex analysis of *in vivo* protein expressions of pro-migratory cytokines were quantified in lungs and brains of rats with cerebral QA lesion (N=5 per organ group), stroke-prone spontaneously hypertensive rats (SHRSP) (N=3 [brain], N=2 [lung]) and healthy rats (N=6 per organ group). Except for IL-6 and TNF- $\alpha$ , pro-migratory cytokines could be detected at higher concentrations in the lungs compared to the brains without obvious differences between the animal models; two-tailed t-test (\*p < 0.05; \*\*\*p<0.001). Error bars: SD. n.d. = not detectable; a.d.l. = above detection limit.

## Supplementary Figure 10

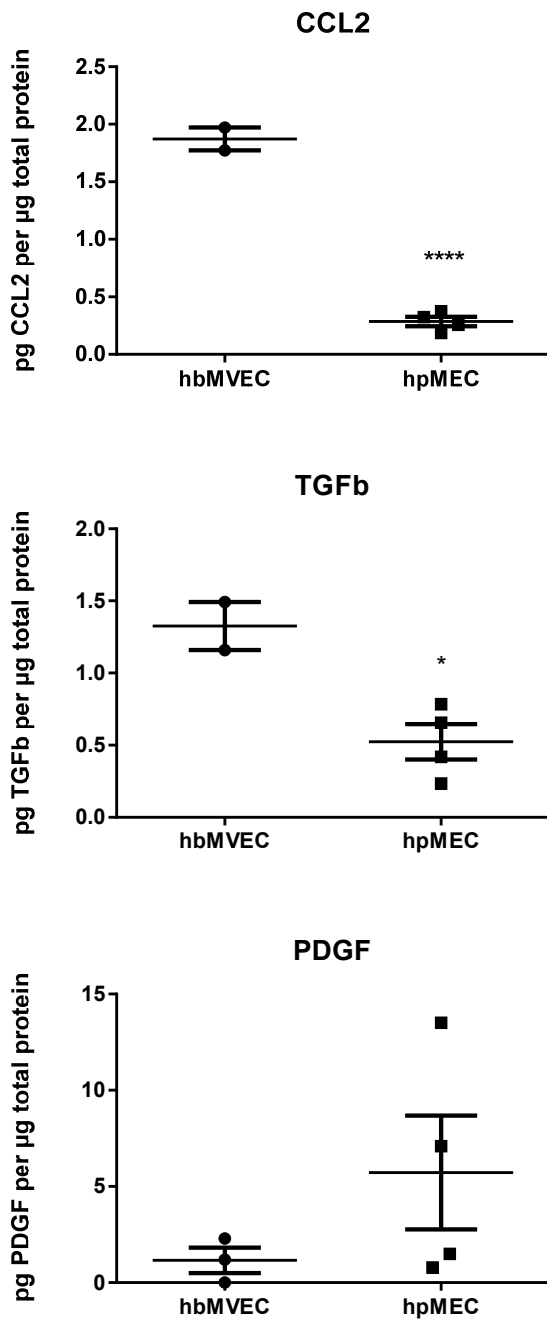

### Supplementary Figure 10 Pro-migratory cytokines in human endothelial cells.

Analyses of pro-migratory cytokines showed greater expression of CCL2, TGF- $\beta$  and PDGF in endothelial cells derived from human brain (hbMVEC) compared to endothelial cells derived from human lung (hpMEC); N=2-4, each data point represents one biological replicate per group; two-tailed t-test (\* $p < 0.05$ ; \*\*\*\* $p < 0.0001$ ). Error bars: SEM.

## Supplementary Table 1

|                      | <b>MSC<br/>(supernatant)</b> | <b>PEI-MSC<br/>(supernatant)</b> | <b>PEI-NP-MSC<br/>(supernatant)</b> | <b>MSC<br/>(lysate)</b> |
|----------------------|------------------------------|----------------------------------|-------------------------------------|-------------------------|
| CD44 protein (ng/mL) | not detectable               | not detectable                   | not detectable                      | 6.2                     |

Detection limit: 0.02 ng / mL

### **Supplementary Table 1 CD44 ELISA analysis of treated and untreated MSC.**

To investigate potential shedding of CD44 molecules from MSC surface after PEI or PEI-NP treatment total MSC protein and supernatants of untreated and treated MSC were analyzed by CD44 ELISA. CD44 protein was detectable only in total MSC protein but not in supernatants indicating that CD44 molecules were not shedded by PEI or PEI-NP treatment.

**Supplementary Table 2**

Descriptive statistics for comparisons with low sample sizes (N≤4).

| Figure                      | Test details           | Mean difference | 95% CI of difference |
|-----------------------------|------------------------|-----------------|----------------------|
| <b>Figure 1 a<br/>CD44</b>  | MSC vs. PEI-MSC        | 30.1            | 7.206 to 52.99       |
|                             | MSC vs. PEI-NP-MSC     | 17.88           | -5.019 to 40.77      |
|                             | PEI-MSC vs. PEI-NP-MSC | -12.23          | -35.12 to 10.67      |
| <b>Figure 1 a<br/>CD105</b> | MSC vs. PEI-MSC        | 44.31           | 8.307 to 80.31       |
|                             | MSC vs. PEI-NP-MSC     | -0.6362         | -36.64 to 35.37      |
|                             | PEI-MSC vs. PEI-NP-MSC | -44.95          | -80.95 to -8.943     |
| <b>Figure 1 a<br/>CD106</b> | MSC vs. PEI-MSC        | 17.1            | 5.144 to 29.05       |
|                             | MSC vs. PEI-NP-MSC     | -10.74          | -22.70 to 1.208      |
|                             | PEI-MSC vs. PEI-NP-MSC | -27.84          | -39.79 to -15.89     |
| <b>Figure 1 a<br/>CD49a</b> | MSC vs. PEI-MSC        | 23.76           | 2.224 to 45.29       |
|                             | MSC vs. PEI-NP-MSC     | 23.95           | 2.420 to 45.48       |
|                             | PEI-MSC vs. PEI-NP-MSC | 0.1964          | -21.34 to 21.73      |
| <b>Figure 1 a<br/>CCR4</b>  | MSC vs. PEI-MSC        | -94.01          | -167.8 to -20.26     |
|                             | MSC vs. PEI-NP-MSC     | -21.18          | -156.0 to 113.6      |
|                             | PEI-MSC vs. PEI-NP-MSC | 72.83           | -98.83 to 244.5      |
| <b>Figure 1 a<br/>CXCR4</b> | MSC vs. PEI-MSC        | 1.179           | -22.32 to 24.68      |
|                             | MSC vs. PEI-NP-MSC     | -32.9           | -56.39 to -9.396     |
|                             | PEI-MSC vs. PEI-NP-MSC | -34.07          | -57.57 to -10.58     |
| <b>Figure 1 a<br/>CD62P</b> | MSC vs. PEI-MSC        | -3.508          | -32.00 to 24.98      |
|                             | MSC vs. PEI-NP-MSC     | -17.48          | -45.97 to 11.01      |
|                             | PEI-MSC vs. PEI-NP-MSC | -13.97          | -42.46 to 14.52      |
| <b>Figure 1 a<br/>CD49d</b> | MSC vs. PEI-MSC        | 5.809           | -19.32 to 30.94      |
|                             | MSC vs. PEI-NP-MSC     | 21.93           | -3.194 to 47.06      |
|                             | PEI-MSC vs. PEI-NP-MSC | 16.12           | -9.003 to 41.25      |
| <b>Figure 1 a<br/>CD29</b>  | MSC vs. PEI-MSC        | 17.83           | -13.10 to 48.76      |
|                             | MSC vs. PEI-NP-MSC     | 4.103           | -26.83 to 35.03      |
|                             | PEI-MSC vs. PEI-NP-MSC | -13.72          | -44.65 to 17.21      |
| <b>Figure 1 a<br/>CCR9</b>  | MSC vs. PEI-MSC        | 7.485           | -17.11 to 32.08      |
|                             | MSC vs. PEI-NP-MSC     | -16.67          | -41.26 to 7.930      |
|                             | PEI-MSC vs. PEI-NP-MSC | -24.15          | -48.75 to 0.4448     |

| Figure            | Test details                               | Mean difference | 95% CI of difference |
|-------------------|--------------------------------------------|-----------------|----------------------|
| <b>Figure 2 d</b> | MSC+TNF vs. MSC -TNF                       | 69.53           | 58.44 to 80.63       |
|                   | MSC+TNF vs. MSC on CHO+TNF                 | 84.39           | 66.58 to 102.2       |
|                   | MSC -TNF vs. MSC on CHO+TNF                | 14.86           | -3.840 to 33.56      |
| <b>Figure 2 e</b> | MSC+TNF vs. MSC+TNF+aCD44                  | -57.71          | -73.62 to -41.80     |
|                   | PEI-NP-MSC+TNF vs.<br>PEI-NP-MSC+TNF+aCD44 | -72.46          | -101.5 to -43.41     |

Supplementary Information - Schäfer et al.

| Figure                     | Test details    | Mean difference | 95% CI of difference |
|----------------------------|-----------------|-----------------|----------------------|
| <b>Figure 3 a<br/>PDGF</b> | MSC vs. PEI-MSC | -6.807          | -13.57 to -0.04265   |
| <b>Figure 3 a<br/>CCL2</b> | MSC vs. PEI-MSC | -2.696          | -6.910 to 1.518      |
| <b>Figure 3 a<br/>HPL</b>  | MSC vs. PEI-MSC | -3.719          | -12.34 to 4.899      |

| Figure                                         | Test details    | Mean difference | 95% CI of difference |
|------------------------------------------------|-----------------|-----------------|----------------------|
| <b>Supplementary<br/>Figure 2 c<br/>CD10</b>   | MSC vs. PEI-MSC | -2.4            | -91.34 to 86.54      |
| <b>Supplementary<br/>Figure 2 c<br/>CD140b</b> | MSC vs. PEI-MSC | -26.25          | -207.3 to 154.8      |
| <b>Supplementary<br/>Figure 2 c<br/>GD2</b>    | MSC vs. PEI-MSC | -4.2            | -38.51 to 30.11      |
| <b>Supplementary<br/>Figure 2 c<br/>PDPN</b>   | MSC vs. PEI-MSC | 1.05            | -85.99 to 88.09      |

| Figure                                        | Test details                                   | Mean difference     | 95% CI of difference |
|-----------------------------------------------|------------------------------------------------|---------------------|----------------------|
| <b>Supplementary<br/>Figure 2 e</b>           | MSC vs. PEI-NP--MSC                            | -0.03292            | -0.2350 to 0.1691    |
|                                               | MSC vs. PEI-MSC                                | -0.02325            | -0.2253 to 0.1788    |
|                                               | MSC vs. PBMNC + 2x10 <sup>4</sup> MSC          | -0.2888             | -0.4908 to -0.08670  |
|                                               | MSC vs. PBMNC + 2x10 <sup>4</sup> PEI-NP-MSC   | -0.3048             | -0.5069 to -0.1028   |
|                                               | MSC vs. PBMNC + 2x10 <sup>4</sup> PEI-MSC      | -0.2718             | -0.4784 to -0.06519  |
|                                               | MSC vs. PBMNC + 1x10 <sup>4</sup> MSC          | -0.6927             | -0.8947 to -0.4906   |
|                                               | MSC vs. PBMNC + 1x10 <sup>4</sup> PEI-NP-MSC   | -0.7606             | -0.9626 to -0.5585   |
|                                               | MSC vs. PBMNC + 1x10 <sup>4</sup> PEI--MSC     | -0.7725             | -0.9746 to -0.5704   |
|                                               | MSC vs. PBMNC + 5x10 <sup>3</sup> MSC          | -1.109              | -1.311 to -0.9071    |
|                                               | MSC vs. PBMNC + 5x10 <sup>3</sup> PEI-NP-MSC   | -1.115              | -1.317 to -0.9131    |
|                                               | MSC vs. PBMNC + 5x10 <sup>3</sup> PEI-MSC      | -1.032              | -1.244 to -0.8197    |
|                                               | MSC vs. PBMNC + 2.5x10 <sup>3</sup> MSC        | -1.067              | -1.274 to -0.8608    |
|                                               | MSC vs. PBMNC + 2.5x10 <sup>3</sup> PEI-NP-MSC | -1.145              | -1.352 to -0.9385    |
|                                               | MSC vs. PBMNC + 2.5x10 <sup>3</sup> PEI--MSC   | -1.16               | -1.362 to -0.9580    |
|                                               | MSC vs. PBMNC                                  | -1.16               | -1.362 to -0.9575    |
|                                               | PEI-NP--MSC vs. PEI-MSC                        | 0.009667            | -0.1924 to 0.2117    |
| PEI-NP--MSC vs. PBMNC + 2x10 <sup>4</sup> MSC | -0.2558                                        | -0.4579 to -0.05378 |                      |

Supplementary Information - Schäfer et al.

|                                                                           |          |                     |
|---------------------------------------------------------------------------|----------|---------------------|
| PEI-NP--MSC vs. PBMNC + 2x10 <sup>4</sup><br>PEI-NP-MSC                   | -0.2719  | -0.4740 to -0.06986 |
| PEI-NP--MSC vs. PBMNC + 2x10 <sup>4</sup><br>PEI-MSC                      | -0.2389  | -0.4455 to -0.03228 |
| PEI-NP--MSC vs. PBMNC + 1x10 <sup>4</sup><br>MSC                          | -0.6598  | -0.8618 to -0.4577  |
| PEI-NP--MSC vs. PBMNC + 1x10 <sup>4</sup><br>PEI-NP-MSC                   | -0.7277  | -0.9297 to -0.5256  |
| PEI-NP--MSC vs. PBMNC + 1x10 <sup>4</sup><br>PEI--MSC                     | -0.7396  | -0.9416 to -0.5375  |
| PEI-NP--MSC vs. PBMNC + 5x10 <sup>3</sup><br>MSC                          | -1.076   | -1.278 to -0.8742   |
| PEI-NP--MSC vs. PBMNC + 5x10 <sup>3</sup><br>PEI-NP-MSC                   | -1.082   | -1.284 to -0.8802   |
| PEI-NP--MSC vs. PBMNC + 5x10 <sup>3</sup><br>PEI-MSC                      | -0.9987  | -1.211 to -0.7868   |
| PEI-NP--MSC vs. PBMNC +<br>2.5x10 <sup>3</sup> MSC                        | -1.035   | -1.241 to -0.8279   |
| PEI-NP--MSC vs. PBMNC +<br>2.5x10 <sup>3</sup> PEI-NP-MSC                 | -1.112   | -1.319 to -0.9055   |
| PEI-NP--MSC vs. PBMNC +<br>2.5x10 <sup>3</sup> PEI--MSC                   | -1.127   | -1.329 to -0.9251   |
| PEI-NP--MSC vs. PBMNC                                                     | -1.127   | -1.329 to -0.9246   |
| PEI-MSC vs. PBMNC + 2x10 <sup>4</sup><br>MSC                              | -0.2655  | -0.4676 to -0.06345 |
| PEI-MSC vs. PBMNC + 2x10 <sup>4</sup> PEI-<br>NP-MSC                      | -0.2816  | -0.4836 to -0.07953 |
| PEI-MSC vs. PBMNC + 2x10 <sup>4</sup> PEI-<br>MSC                         | -0.2485  | -0.4551 to -0.04194 |
| PEI-MSC vs. PBMNC + 1x10 <sup>4</sup><br>MSC                              | -0.6694  | -0.8715 to -0.4674  |
| PEI-MSC vs. PBMNC + 1x10 <sup>4</sup> PEI-<br>NP-MSC                      | -0.7373  | -0.9394 to -0.5353  |
| PEI-MSC vs. PBMNC + 1x10 <sup>4</sup><br>PEI--MSC                         | -0.7493  | -0.9513 to -0.5472  |
| PEI-MSC vs. PBMNC + 5x10 <sup>3</sup><br>MSC                              | -1.086   | -1.288 to -0.8839   |
| PEI-MSC vs. PBMNC + 5x10 <sup>3</sup> PEI-<br>NP-MSC                      | -1.092   | -1.294 to -0.8899   |
| PEI-MSC vs. PBMNC + 5x10 <sup>3</sup> PEI-<br>MSC                         | -1.008   | -1.220 to -0.7965   |
| PEI-MSC vs. PBMNC + 2.5x10 <sup>3</sup><br>MSC                            | -1.044   | -1.251 to -0.8376   |
| PEI-MSC vs. PBMNC + 2.5x10 <sup>3</sup><br>PEI-NP-MSC                     | -1.122   | -1.328 to -0.9152   |
| PEI-MSC vs. PBMNC + 2.5x10 <sup>3</sup><br>PEI--MSC                       | -1.137   | -1.339 to -0.9348   |
| PEI-MSC vs. PBMNC                                                         | -1.136   | -1.338 to -0.9343   |
| PBMNC + 2x10 <sup>4</sup> MSC vs. PBMNC<br>+ 2x10 <sup>4</sup> PEI-NP-MSC | -0.01608 | -0.2181 to 0.1860   |
| PBMNC + 2x10 <sup>4</sup> MSC vs. PBMNC<br>+ 2x10 <sup>4</sup> PEI-MSC    | 0.01696  | -0.1896 to 0.2236   |
| PBMNC + 2x10 <sup>4</sup> MSC vs. PBMNC<br>+ 1x10 <sup>4</sup> MSC        | -0.4039  | -0.6060 to -0.2019  |
| PBMNC + 2x10 <sup>4</sup> MSC vs. PBMNC<br>+ 1x10 <sup>4</sup> PEI-NP-MSC | -0.4718  | -0.6739 to -0.2698  |
| PBMNC + 2x10 <sup>4</sup> MSC vs. PBMNC<br>+ 1x10 <sup>4</sup> PEI--MSC   | -0.4838  | -0.6858 to -0.2817  |
| PBMNC + 2x10 <sup>4</sup> MSC vs. PBMNC<br>+ 5x10 <sup>3</sup> MSC        | -0.8204  | -1.022 to -0.6184   |

Supplementary Information - Schäfer et al.

|                             |                                                                                 |          |                    |
|-----------------------------|---------------------------------------------------------------------------------|----------|--------------------|
| Supplementary<br>Figure 2 e | PBMNC + 2x10 <sup>4</sup> MSC vs. PBMNC + 5x10 <sup>3</sup> PEI-NP-MSC          | -0.8264  | -1.028 to -0.6244  |
|                             | PBMNC + 2x10 <sup>4</sup> MSC vs. PBMNC + 5x10 <sup>3</sup> PEI-MSC             | -0.7429  | -0.9548 to -0.5310 |
|                             | PBMNC + 2x10 <sup>4</sup> MSC vs. PBMNC + 2.5x10 <sup>3</sup> MSC               | -0.7787  | -0.9853 to -0.5721 |
|                             | PBMNC + 2x10 <sup>4</sup> MSC vs. PBMNC + 2.5x10 <sup>3</sup> PEI-NP-MSC        | -0.8563  | -1.063 to -0.6497  |
|                             | PBMNC + 2x10 <sup>4</sup> MSC vs. PBMNC + 2.5x10 <sup>3</sup> PEI--MSC          | -0.8713  | -1.073 to -0.6693  |
|                             | PBMNC + 2x10 <sup>4</sup> MSC vs. PBMNC                                         | -0.8708  | -1.073 to -0.6688  |
|                             | PBMNC + 2x10 <sup>4</sup> PEI-NP-MSC vs. PBMNC + 2x10 <sup>4</sup> PEI-MSC      | 0.03305  | -0.1735 to 0.2396  |
|                             | PBMNC + 2x10 <sup>4</sup> PEI-NP-MSC vs. PBMNC + 1x10 <sup>4</sup> MSC          | -0.3878  | -0.5899 to -0.1858 |
|                             | PBMNC + 2x10 <sup>4</sup> PEI-NP-MSC vs. PBMNC + 1x10 <sup>4</sup> PEI-NP-MSC   | -0.4558  | -0.6578 to -0.2537 |
|                             | PBMNC + 2x10 <sup>4</sup> PEI-NP-MSC vs. PBMNC + 1x10 <sup>4</sup> PEI--MSC     | -0.4677  | -0.6697 to -0.2656 |
|                             | PBMNC + 2x10 <sup>4</sup> PEI-NP-MSC vs. PBMNC + 5x10 <sup>3</sup> MSC          | -0.8043  | -1.006 to -0.6023  |
|                             | PBMNC + 2x10 <sup>4</sup> PEI-NP-MSC vs. PBMNC + 5x10 <sup>3</sup> PEI-NP-MSC   | -0.8103  | -1.012 to -0.6083  |
|                             | PBMNC + 2x10 <sup>4</sup> PEI-NP-MSC vs. PBMNC + 5x10 <sup>3</sup> PEI-MSC      | -0.7268  | -0.9387 to -0.5149 |
|                             | PBMNC + 2x10 <sup>4</sup> PEI-NP-MSC vs. PBMNC + 2.5x10 <sup>3</sup> MSC        | -0.7626  | -0.9692 to -0.5560 |
|                             | PBMNC + 2x10 <sup>4</sup> PEI-NP-MSC vs. PBMNC + 2.5x10 <sup>3</sup> PEI-NP-MSC | -0.8402  | -1.047 to -0.6336  |
|                             | PBMNC + 2x10 <sup>4</sup> PEI-NP-MSC vs. PBMNC + 2.5x10 <sup>3</sup> PEI--MSC   | -0.8553  | -1.057 to -0.6532  |
|                             | PBMNC + 2x10 <sup>4</sup> PEI-NP-MSC vs. PBMNC                                  | -0.8548  | -1.057 to -0.6527  |
|                             | PBMNC + 2x10 <sup>4</sup> PEI-MSC vs. PBMNC + 1x10 <sup>4</sup> MSC             | -0.4209  | -0.6275 to -0.2143 |
|                             | PBMNC + 2x10 <sup>4</sup> PEI-MSC vs. PBMNC + 1x10 <sup>4</sup> PEI-NP-MSC      | -0.4888  | -0.6954 to -0.2822 |
|                             | PBMNC + 2x10 <sup>4</sup> PEI-MSC vs. PBMNC + 1x10 <sup>4</sup> PEI--MSC        | -0.5007  | -0.7073 to -0.2941 |
|                             | PBMNC + 2x10 <sup>4</sup> PEI-MSC vs. PBMNC + 5x10 <sup>3</sup> MSC             | -0.8374  | -1.044 to -0.6308  |
|                             | PBMNC + 2x10 <sup>4</sup> PEI-MSC vs. PBMNC + 5x10 <sup>3</sup> PEI-NP-MSC      | -0.8434  | -1.050 to -0.6368  |
|                             | PBMNC + 2x10 <sup>4</sup> PEI-MSC vs. PBMNC + 5x10 <sup>3</sup> PEI-MSC         | -0.7598  | -0.9761 to -0.5436 |
|                             | PBMNC + 2x10 <sup>4</sup> PEI-MSC vs. PBMNC + 2.5x10 <sup>3</sup> MSC           | -0.7956  | -1.007 to -0.5846  |
|                             | PBMNC + 2x10 <sup>4</sup> PEI-MSC vs. PBMNC + 2.5x10 <sup>3</sup> PEI-NP-MSC    | -0.8733  | -1.084 to -0.6622  |
|                             | PBMNC + 2x10 <sup>4</sup> PEI-MSC vs. PBMNC + 2.5x10 <sup>3</sup> PEI--MSC      | -0.8883  | -1.095 to -0.6817  |
|                             | PBMNC + 2x10 <sup>4</sup> PEI-MSC vs. PBMNC                                     | -0.8878  | -1.094 to -0.6812  |
|                             | PBMNC + 1x10 <sup>4</sup> MSC vs. PBMNC + 1x10 <sup>4</sup> PEI-NP-MSC          | -0.06792 | -0.2700 to 0.1341  |
|                             | PBMNC + 1x10 <sup>4</sup> MSC vs. PBMNC + 1x10 <sup>4</sup> PEI--MSC            | -0.07983 | -0.2819 to 0.1222  |
|                             | PBMNC + 1x10 <sup>4</sup> MSC vs. PBMNC + 5x10 <sup>3</sup> MSC                 | -0.4165  | -0.6186 to -0.2144 |
|                             | PBMNC + 1x10 <sup>4</sup> MSC vs. PBMNC                                         | -0.4225  | -0.6246 to -0.2204 |



Supplementary Information - Schäfer et al.

|                                     |                                                                               |          |                     |
|-------------------------------------|-------------------------------------------------------------------------------|----------|---------------------|
| <b>Supplementary<br/>Figure 2 e</b> | + 5x10 <sup>3</sup> PEI-NP-MS                                                 |          |                     |
|                                     | PBMNC + 1x10 <sup>4</sup> MS vs. PBMNC + 5x10 <sup>3</sup> PEI-MS             | -0.339   | -0.5509 to -0.1271  |
|                                     | PBMNC + 1x10 <sup>4</sup> MS vs. PBMNC + 2.5x10 <sup>3</sup> MS               | -0.3748  | -0.5814 to -0.1682  |
|                                     | PBMNC + 1x10 <sup>4</sup> MS vs. PBMNC + 2.5x10 <sup>3</sup> PEI-NP-MS        | -0.4524  | -0.6590 to -0.2458  |
|                                     | PBMNC + 1x10 <sup>4</sup> MS vs. PBMNC + 2.5x10 <sup>3</sup> PEI--MS          | -0.4674  | -0.6695 to -0.2654  |
|                                     | PBMNC + 1x10 <sup>4</sup> MS vs. PBMNC                                        | -0.4669  | -0.6690 to -0.2649  |
|                                     | PBMNC + 1x10 <sup>4</sup> PEI-NP-MS vs. PBMNC + 1x10 <sup>4</sup> PEI--MS     | -0.01192 | -0.2140 to 0.1901   |
|                                     | PBMNC + 1x10 <sup>4</sup> PEI-NP-MS vs. PBMNC + 5x10 <sup>3</sup> MS          | -0.3486  | -0.5506 to -0.1465  |
|                                     | PBMNC + 1x10 <sup>4</sup> PEI-NP-MS vs. PBMNC + 5x10 <sup>3</sup> PEI-NP-MS   | -0.3546  | -0.5566 to -0.1525  |
|                                     | PBMNC + 1x10 <sup>4</sup> PEI-NP-MS vs. PBMNC + 5x10 <sup>3</sup> PEI-MS      | -0.2711  | -0.4830 to -0.05913 |
|                                     | PBMNC + 1x10 <sup>4</sup> PEI-NP-MS vs. PBMNC + 2.5x10 <sup>3</sup> MS        | -0.3068  | -0.5134 to -0.1002  |
|                                     | PBMNC + 1x10 <sup>4</sup> PEI-NP-MS vs. PBMNC + 2.5x10 <sup>3</sup> PEI-NP-MS | -0.3845  | -0.5911 to -0.1779  |
|                                     | PBMNC + 1x10 <sup>4</sup> PEI-NP-MS vs. PBMNC + 2.5x10 <sup>3</sup> PEI--MS   | -0.3995  | -0.6016 to -0.1974  |
|                                     | PBMNC + 1x10 <sup>4</sup> PEI-NP-MS vs. PBMNC                                 | -0.399   | -0.6011 to -0.1969  |
|                                     | PBMNC + 1x10 <sup>4</sup> PEI--MS vs. PBMNC + 5x10 <sup>3</sup> MS            | -0.3367  | -0.5387 to -0.1346  |
|                                     | PBMNC + 1x10 <sup>4</sup> PEI--MS vs. PBMNC + 5x10 <sup>3</sup> PEI-NP-MS     | -0.3427  | -0.5447 to -0.1406  |
|                                     | PBMNC + 1x10 <sup>4</sup> PEI--MS vs. PBMNC + 5x10 <sup>3</sup> PEI-MS        | -0.2591  | -0.4710 to -0.04722 |
|                                     | PBMNC + 1x10 <sup>4</sup> PEI--MS vs. PBMNC + 2.5x10 <sup>3</sup> MS          | -0.2949  | -0.5015 to -0.08833 |
|                                     | PBMNC + 1x10 <sup>4</sup> PEI--MS vs. PBMNC + 2.5x10 <sup>3</sup> PEI-NP-MS   | -0.3726  | -0.5792 to -0.1660  |
|                                     | PBMNC + 1x10 <sup>4</sup> PEI--MS vs. PBMNC + 2.5x10 <sup>3</sup> PEI--MS     | -0.3876  | -0.5896 to -0.1855  |
|                                     | PBMNC + 1x10 <sup>4</sup> PEI--MS vs. PBMNC                                   | -0.3871  | -0.5891 to -0.1850  |
|                                     | PBMNC + 5x10 <sup>3</sup> MS vs. PBMNC + 5x10 <sup>3</sup> PEI-NP-MS          | -0.006   | -0.2081 to 0.1961   |
|                                     | PBMNC + 5x10 <sup>3</sup> MS vs. PBMNC + 5x10 <sup>3</sup> PEI-MS             | 0.07753  | -0.1344 to 0.2894   |
|                                     | PBMNC + 5x10 <sup>3</sup> MS vs. PBMNC + 2.5x10 <sup>3</sup> MS               | 0.04174  | -0.1649 to 0.2483   |
|                                     | PBMNC + 5x10 <sup>3</sup> MS vs. PBMNC + 2.5x10 <sup>3</sup> PEI-NP-MS        | -0.03589 | -0.2425 to 0.1707   |
|                                     | PBMNC + 5x10 <sup>3</sup> MS vs. PBMNC + 2.5x10 <sup>3</sup> PEI--MS          | -0.05092 | -0.2530 to 0.1511   |
|                                     | PBMNC + 5x10 <sup>3</sup> MS vs. PBMNC                                        | -0.05042 | -0.2525 to 0.1516   |
|                                     | PBMNC + 5x10 <sup>3</sup> PEI-NP-MS vs. PBMNC + 5x10 <sup>3</sup> PEI-MS      | 0.08353  | -0.1284 to 0.2954   |
|                                     | PBMNC + 5x10 <sup>3</sup> PEI-NP-MS vs. PBMNC + 2.5x10 <sup>3</sup> MS        | 0.04774  | -0.1589 to 0.2543   |
|                                     | PBMNC + 5x10 <sup>3</sup> PEI-NP-MS vs. PBMNC + 2.5x10 <sup>3</sup> PEI-NP-MS | -0.02989 | -0.2365 to 0.1767   |
|                                     | PBMNC + 5x10 <sup>3</sup> PEI-NP-MS vs. PBMNC + 2.5x10 <sup>3</sup> PEI--MS   | -0.04492 | -0.2470 to 0.1571   |

Supplementary Information - Schäfer et al.

|                                     |                                                                                 |          |                    |
|-------------------------------------|---------------------------------------------------------------------------------|----------|--------------------|
| <b>Supplementary<br/>Figure 2 e</b> | PBMNC + 5x10 <sup>3</sup> PEI-NP-MSC vs. PBMNC                                  | -0.04442 | -0.2465 to 0.1576  |
|                                     | PBMNC + 5x10 <sup>3</sup> PEI-MSC vs. PBMNC + 2.5x10 <sup>3</sup> MSC           | -0.03579 | -0.2520 to 0.1805  |
|                                     | PBMNC + 5x10 <sup>3</sup> PEI-MSC vs. PBMNC + 2.5x10 <sup>3</sup> PEI-NP-MSC    | -0.1134  | -0.3297 to 0.1028  |
|                                     | PBMNC + 5x10 <sup>3</sup> PEI-MSC vs. PBMNC + 2.5x10 <sup>3</sup> PEI--MSC      | -0.1285  | -0.3404 to 0.08347 |
|                                     | PBMNC + 5x10 <sup>3</sup> PEI-MSC vs. PBMNC                                     | -0.128   | -0.3399 to 0.08397 |
|                                     | PBMNC + 2.5x10 <sup>3</sup> MSC vs. PBMNC + 2.5x10 <sup>3</sup> PEI-NP-MSC      | -0.07764 | -0.2887 to 0.1334  |
|                                     | PBMNC + 2.5x10 <sup>3</sup> MSC vs. PBMNC + 2.5x10 <sup>3</sup> PEI--MSC        | -0.09266 | -0.2993 to 0.1139  |
|                                     | PBMNC + 2.5x10 <sup>3</sup> MSC vs. PBMNC                                       | -0.09216 | -0.2988 to 0.1144  |
|                                     | PBMNC + 2.5x10 <sup>3</sup> PEI-NP-MSC vs. PBMNC + 2.5x10 <sup>3</sup> PEI--MSC | -0.01502 | -0.2216 to 0.1916  |
|                                     | PBMNC + 2.5x10 <sup>3</sup> PEI-NP-MSC vs. PBMNC                                | -0.01452 | -0.2211 to 0.1921  |
|                                     | PBMNC + 2.5x10 <sup>3</sup> PEI--MSC vs. PBMNC                                  | 0.0005   | -0.2016 to 0.2026  |

| Figure                                                         | Test details           | Mean difference | 95% CI of difference |
|----------------------------------------------------------------|------------------------|-----------------|----------------------|
| <b>Supplementary<br/>Figure 2 f<br/>VEGF-A<br/>supernatant</b> | MSC vs. PEI-MSC        | -467.5          | -653.1 to -281.9     |
|                                                                | MSC vs. PEI-NP-MSC     | -97             | -282.6 to 88.63      |
|                                                                | PEI-MSC vs. PEI-NP-MSC | 370.5           | 184.9 to 556.1       |
| <b>Supplementary<br/>Figure 2 f<br/>VEGF-A lysate</b>          | MSC vs. PEI-MSC        | -38.35          | -68.79 to -7.911     |
|                                                                | MSC vs. PEI-NP-MSC     | -3.367          | -33.81 to 27.07      |
|                                                                | PEI-MSC vs. PEI-NP-MSC | 34.98           | 4.544 to 65.42       |
| <b>Supplementary<br/>Figure 2 f<br/>NGFb<br/>supernatant</b>   | MSC vs. PEI-MSC        | -23.05          | -24.29 to -21.81     |
|                                                                | MSC vs. PEI-NP-MSC     | 5.81            | 4.573 to 7.047       |
|                                                                | PEI-MSC vs. PEI-NP-MSC | 28.86           | 27.62 to 30.10       |
| <b>Supplementary<br/>Figure 2 f<br/>FGFb<br/>supernatant</b>   | MSC vs. PEI-MSC        | -24.42          | -26.15 to -22.69     |
|                                                                | MSC vs. PEI-NP-MSC     | 18.18           | 16.45 to 19.91       |
|                                                                | PEI-MSC vs. PEI-NP-MSC | 42.6            | 40.87 to 44.33       |
| <b>Supplementary<br/>Figure 2 f<br/>FGFb lysate</b>            | MSC vs. PEI-MSC        | -2360           | -3702 to -1018       |
|                                                                | MSC vs. PEI-NP-MSC     | 1494            | 151.5 to 2836        |
|                                                                | PEI-MSC vs. PEI-NP-MSC | 3854            | 2511 to 5196         |
| <b>Supplementary<br/>Figure 2 f LIF<br/>supernatant</b>        | MSC vs. PEI-MSC        | -38             | -92.85 to 16.85      |
|                                                                | MSC vs. PEI-NP-MSC     | -13.33          | -68.18 to 41.52      |
|                                                                | PEI-MSC vs. PEI-NP-MSC | 24.67           | -30.18 to 79.52      |
| <b>Supplementary<br/>Figure 2 f LIF<br/>lysate</b>             | MSC vs. PEI-MSC        | -9.883          | -17.61 to -2.154     |
|                                                                | MSC vs. PEI-NP-MSC     | -1.367          | -9.096 to 6.362      |
|                                                                | PEI-MSC vs. PEI-NP-MSC | 8.517           | 0.7877 to 16.25      |
| <b>Supplementary<br/>Figure 2 f<br/>HGF<br/>supernatant</b>    | MSC vs. PEI-MSC        | 262.3           | 196.2 to 328.5       |
|                                                                | MSC vs. PEI-NP-MSC     | 290.3           | 224.2 to 356.5       |
|                                                                | PEI-MSC vs. PEI-NP-MSC | 28              | -38.14 to 94.14      |

Supplementary Information - Schäfer et al.

|                                                   |                        |        |                  |
|---------------------------------------------------|------------------------|--------|------------------|
| <b>Supplementary Figure 2 f HGF lysate</b>        | MSC vs. PEI-MSC        | 323.2  | 200.8 to 445.5   |
|                                                   | MSC vs. PEI-NP-MSC     | 186.8  | 64.45 to 309.2   |
|                                                   | PEI-MSC vs. PEI-NP-MSC | -136.3 | -258.7 to -13.95 |
| <b>Supplementary Figure 2 f ANG-1 supernatant</b> | MSC vs. PEI-MSC        | 205    | 162.9 to 247.2   |
|                                                   | MSC vs. PEI-NP-MSC     | 119.9  | 77.76 to 162.0   |
|                                                   | PEI-MSC vs. PEI-NP-MSC | -85.13 | -127.3 to -42.99 |
| <b>Supplementary Figure 2 f ANG-1 lysate</b>      | MSC vs. PEI-MSC        | 47.03  | 35.36 to 58.71   |
|                                                   | MSC vs. PEI-NP-MSC     | 28.17  | 16.49 to 39.85   |
|                                                   | PEI-MSC vs. PEI-NP-MSC | -18.86 | -30.54 to -7.186 |

| Figure                                             | Test details    | Mean difference | 95% CI of difference |
|----------------------------------------------------|-----------------|-----------------|----------------------|
| <b>Supplementary Figure 5 a CCR4 no ck</b>         | MSC vs. PEI-MSC | -788.4          | -2745 to 1169        |
| <b>Supplementary Figure 5 a CCR4 with CCL2</b>     | MSC vs. PEI-MSC | -527.1          | -895.0 to -159.1     |
| <b>Supplementary Figure 5 a CCR4 with CXCL12</b>   | MSC vs. PEI-MSC | -851.3          | -2097 to 394.5       |
| <b>Supplementary Figure 5 a CD140b no ck</b>       | MSC vs. PEI-MSC | -94.65          | -103.5 to -85.85     |
| <b>Supplementary Figure 5 a CD140b with CCL2</b>   | MSC vs. PEI-MSC | -112.6          | -171.8 to -53.39     |
| <b>Supplementary Figure 5 a CD140b with CXCL12</b> | MSC vs. PEI-MSC | -140.5          | -148.0 to -133.1     |
| <b>Supplementary Figure 5 a CD10 no ck</b>         | MSC vs. PEI-MSC | 30.98           | 25.18 to 36.77       |
| <b>Supplementary Figure 5 a CD10 with CCL2</b>     | MSC vs. PEI-MSC | 37.66           | 35.24 to 40.09       |
| <b>Supplementary Figure 5 a CD10 with CXCL12</b>   | MSC vs. PEI-MSC | 32.58           | 10.19 to 54.96       |
| <b>Supplementary Figure 5 a GD2 no ck</b>          | MSC vs. PEI-MSC | 60.95           | 51.76 to 70.14       |

Supplementary Information - Schäfer et al.

|                                                     |                 |       |                |
|-----------------------------------------------------|-----------------|-------|----------------|
| <b>Supplementary Figure 5 a<br/>GD2 with CCL2</b>   | MSC vs. PEI-MSC | 59.74 | 54.18 to 65.30 |
| <b>Supplementary Figure 5 a<br/>GD2 with CXCL12</b> | MSC vs. PEI-MSC | 33.66 | 28.25 to 39.07 |

| <b>Figure</b>                           | <b>Test details</b> | <b>Mean difference</b> | <b>95% CI of difference</b> |
|-----------------------------------------|---------------------|------------------------|-----------------------------|
| <b>Supplementary Figure 10<br/>CCL2</b> | hbMVEC vs. hpMEC    | -1.587                 | -1.825 to -1.348            |
| <b>Supplementary Figure 10<br/>TGFb</b> | hbMVEC vs. hpMEC    | -0.803                 | -1.386 to -0.2202           |
| <b>Supplementary Figure 10<br/>PDGF</b> | hbMVEC vs. hpMEC    | 4.56                   | -4.542 to 13.66             |

## Full Western Blots

The blue frames indicate the areas shown in the Figures.

CD44 Fig.1b

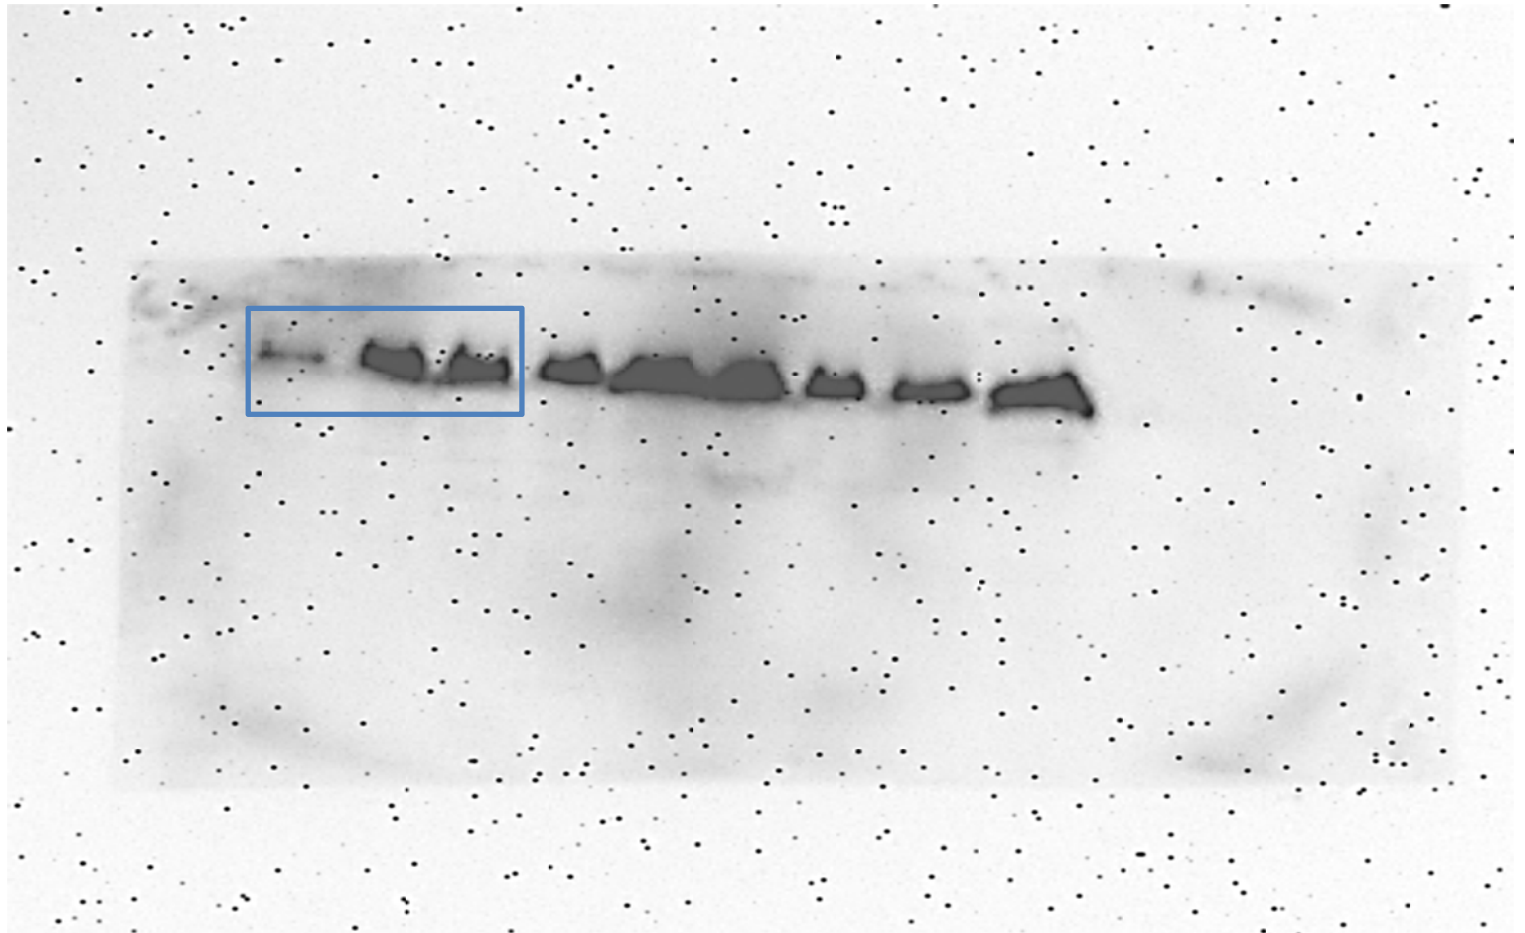

**CXCR4 Fig.1b**

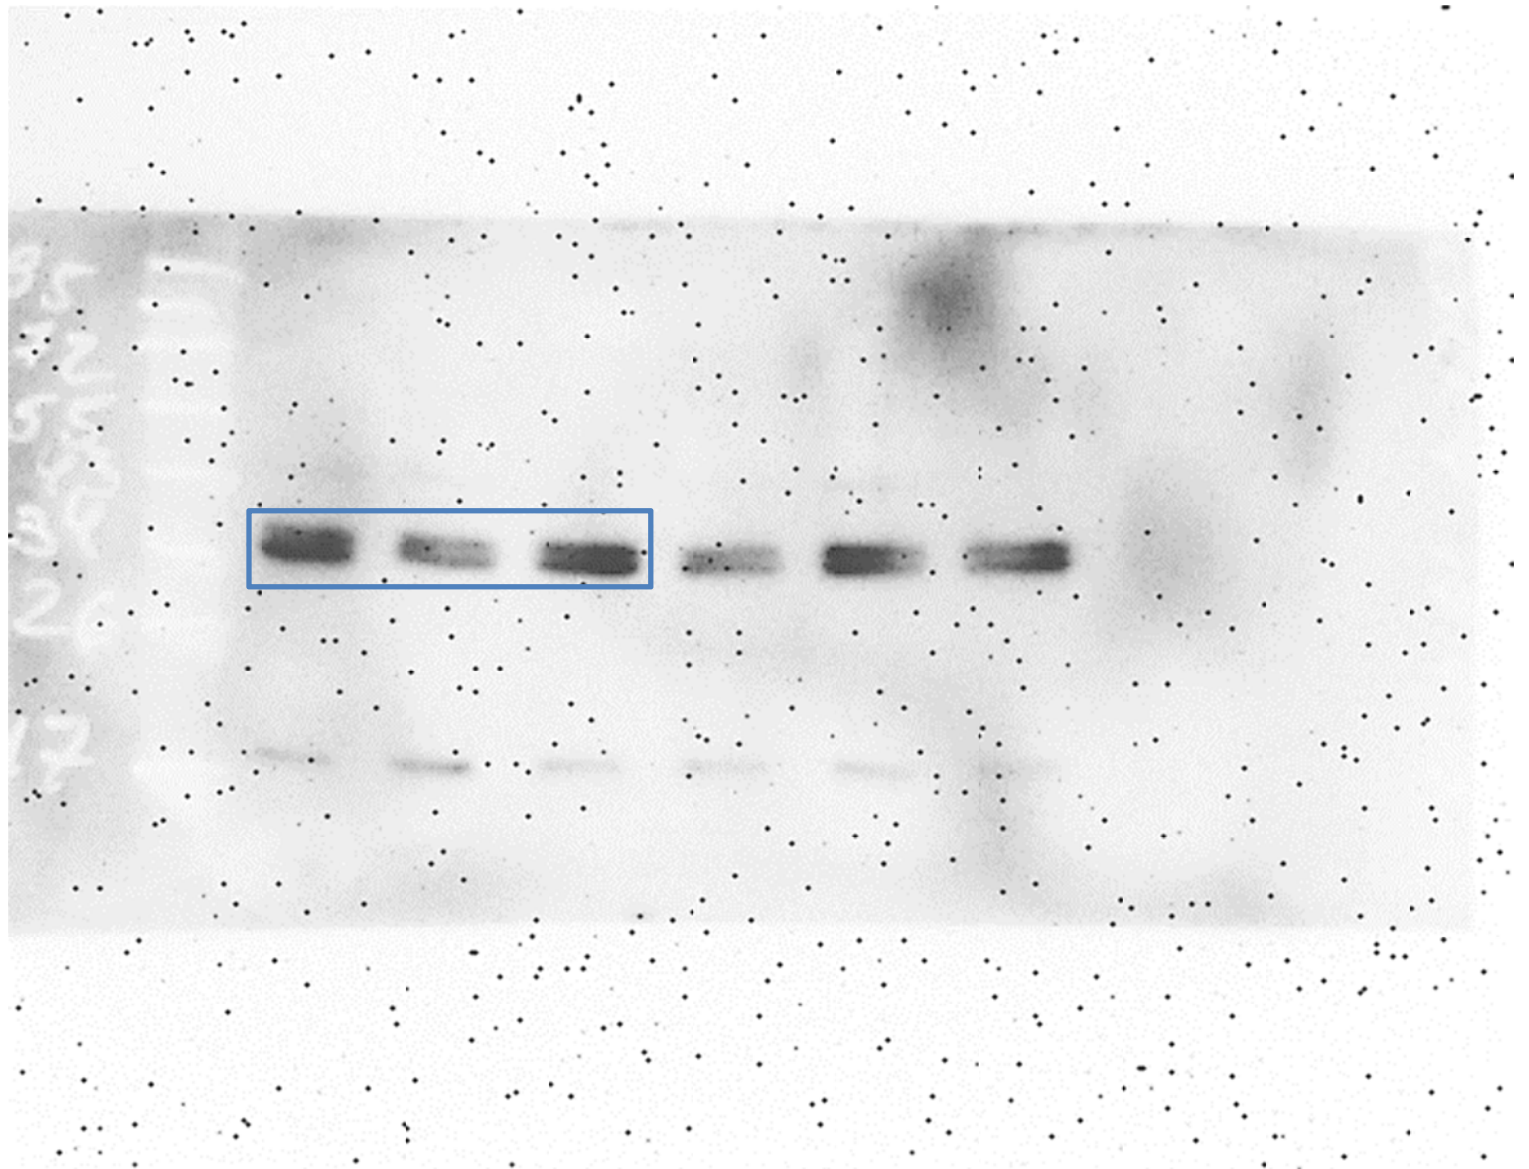

**GAPDH Fig.1b**

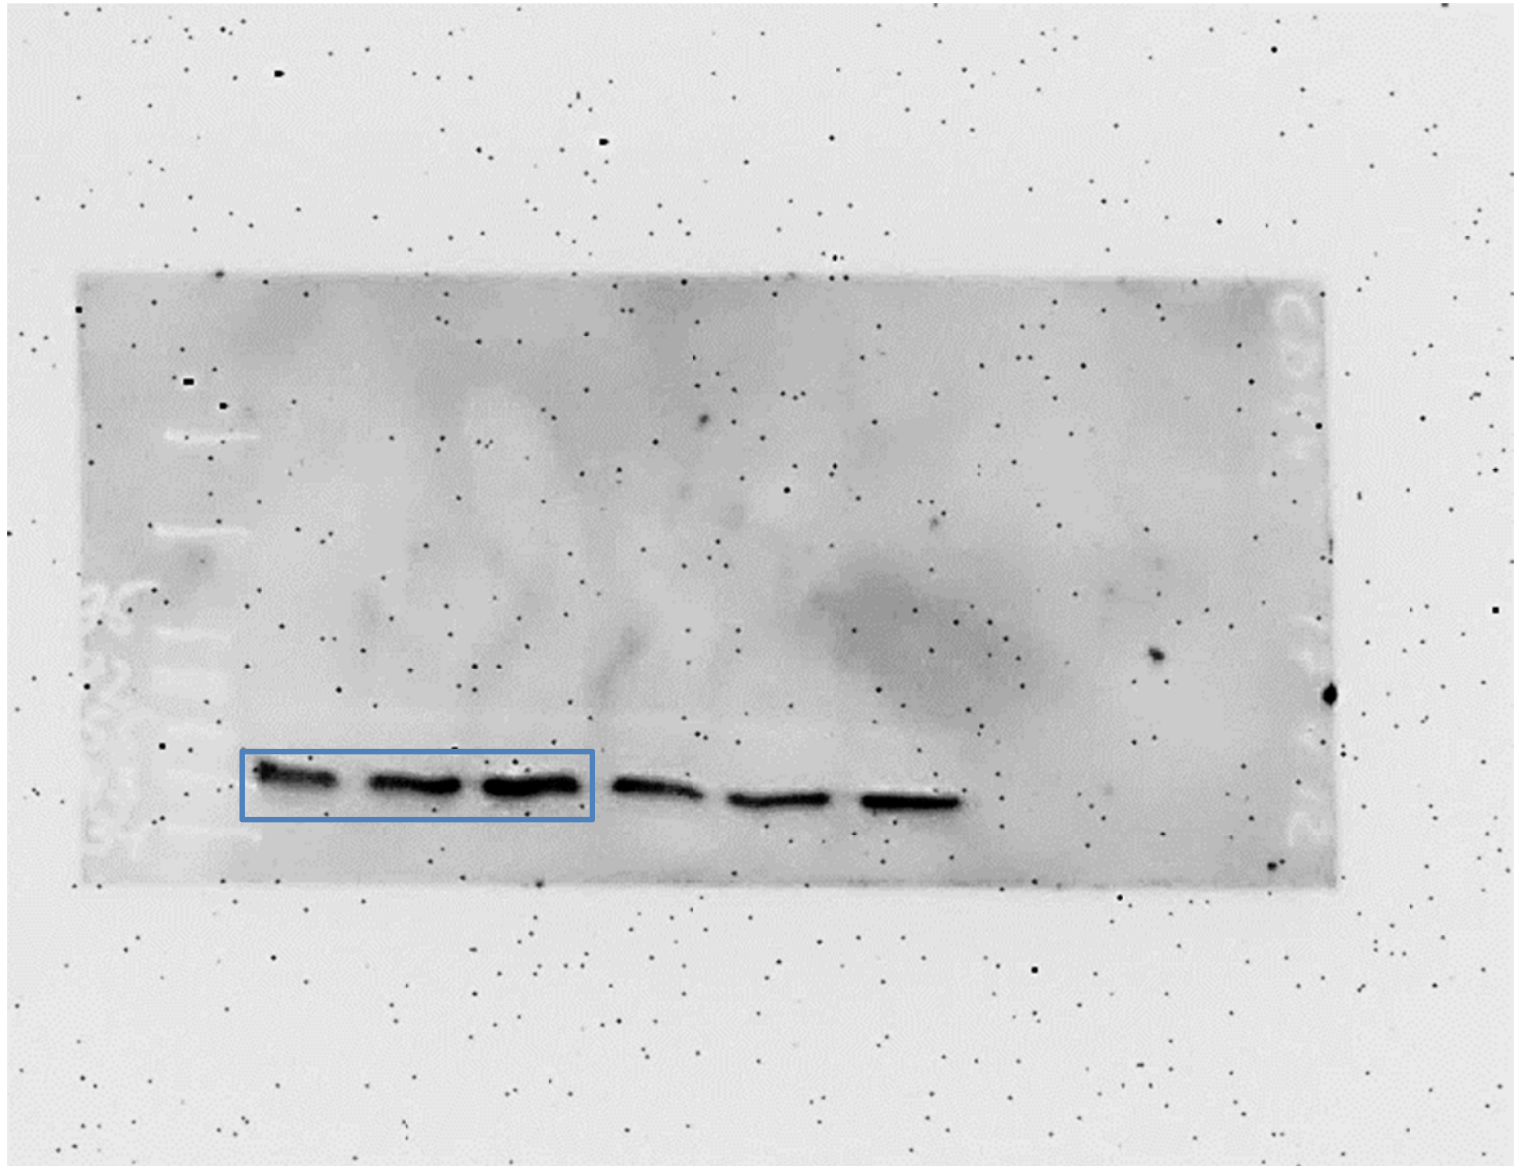

**CCL2 Suppl Fig.6**

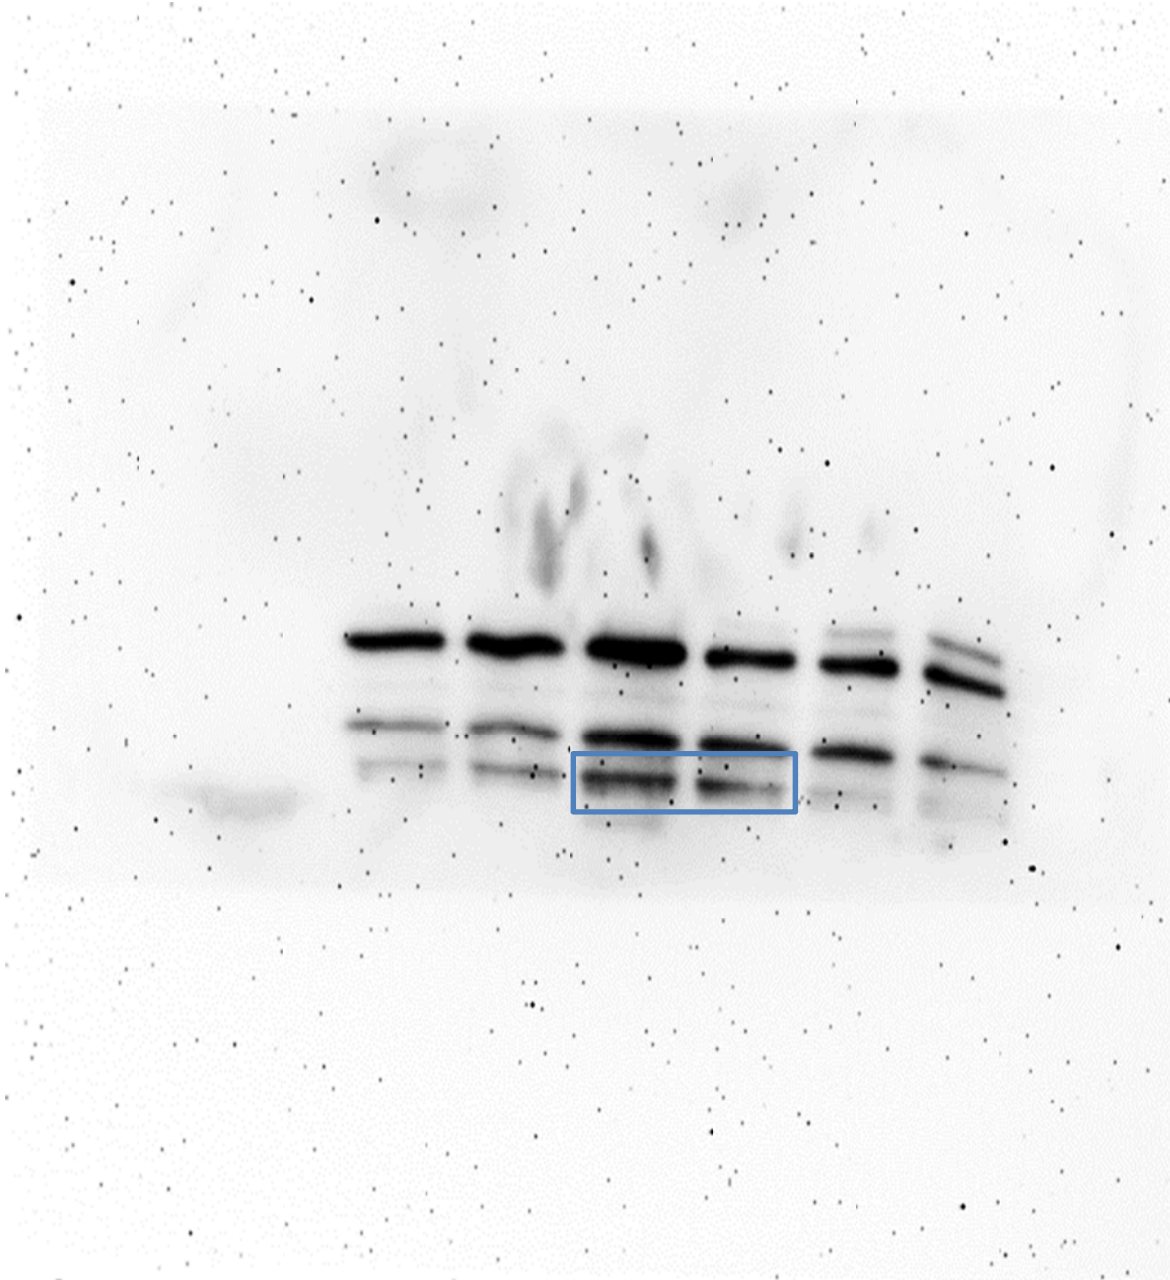



**GAPDH Suppl Fig.6**

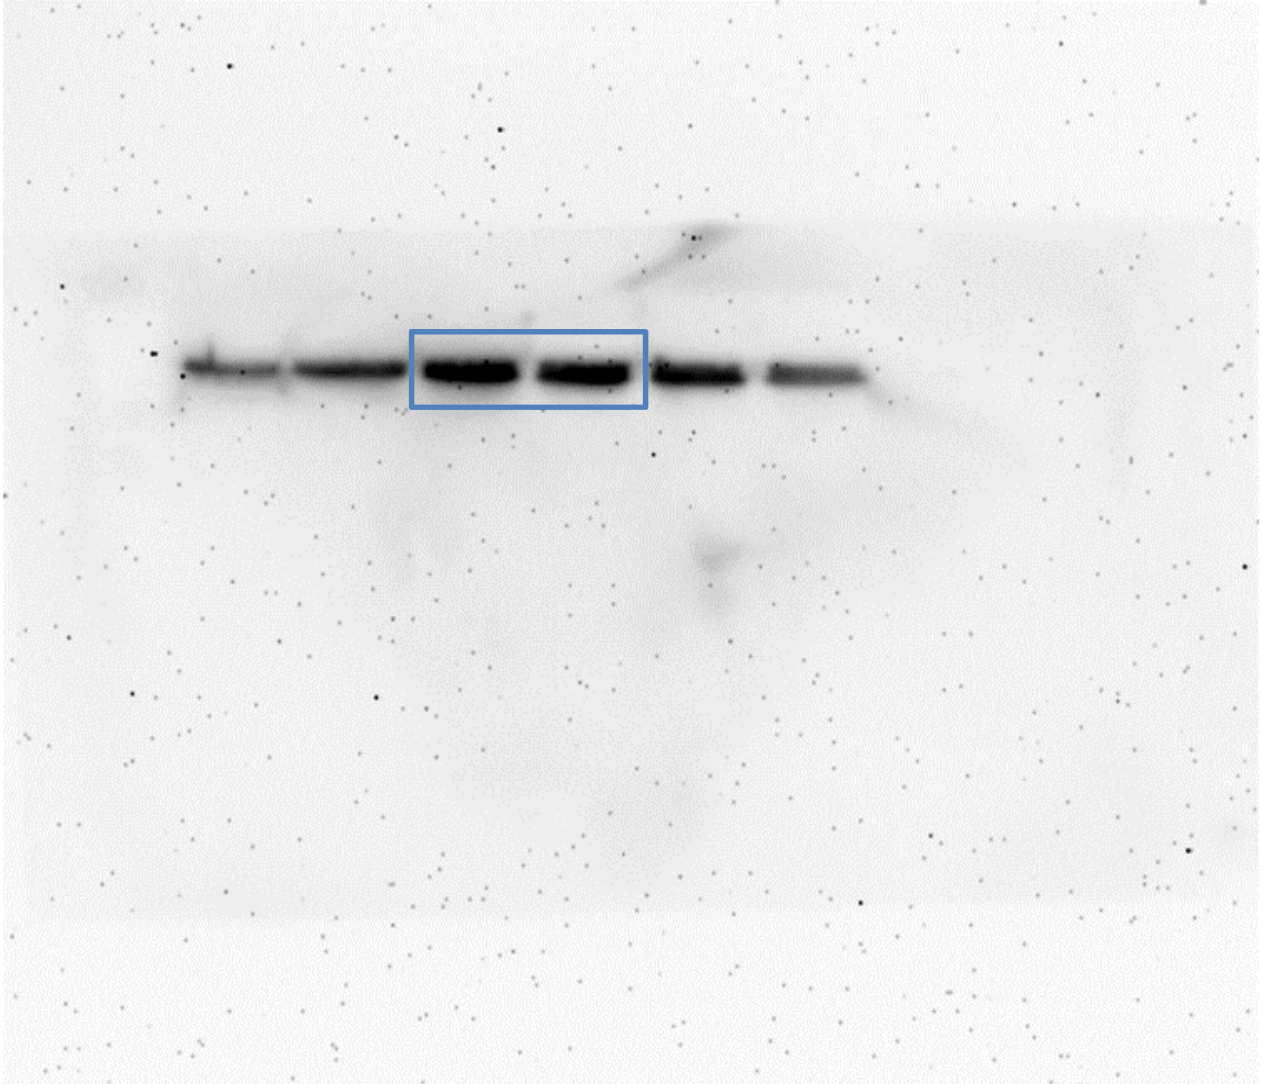

Supplement: mmc1.pdf [file mmc1.pdf]
